# Supplementary material for: Research on scraper conveyor load prediction method based on wavelet transform and BP neural network
Source: Research Square preprint supplement (doi:10.21203/rs.3.rs-5440016/v1), 2025-04-17
Supplement: Supplementary file 1 [file 3ce68f1c44ae06c09ad2030f.xlsx]

## Sheet: Sheet1
Wavelet decomposition of actual values						Wavelet noise reduction actual						Wavelet noise reduction predictions						DWT-BPneural network					BP neural network
sample size	a3	d1	d2	d3		sample size	a3	d1	d2	d3		a3	d1	d2	d3			sample size	actual value	projected value			sample size	actual value	projected value
1	92.0314	0.133295	0.0476466	0.023051		1	90.3607	0.0124093	0.102282	-0.466823		90.377	0.0112979	0.102903	-0.471274			1	90.091	90.02			1	90.091	90.1365
2	92.0435	-0.0391518	-0.116237	-0.0973547		2	90.206	-0.0107234	0.0167514	-0.386502		90.2236	-0.0105478	0.016824	-0.389444			2	89.7903	89.8404			2	89.7903	89.8311
3	92.0556	-0.0251687	-0.0132221	-0.196193		3	90.0356	0.00647802	-0.120455	-0.219135		90.0479	0.00599099	-0.122208	-0.223578			3	89.5608	89.7081			3	89.5608	89.5914
4	92.0683	0.00448835	0.143498	-0.322651		4	89.8729	-0.00239221	-0.0667633	-0.0752259		89.8928	-0.00137666	-0.0763175	-0.0809245			4	89.4129	89.7342			4	89.4129	89.4324
5	92.0557	0.0116259	0.0210699	-0.1896		5	89.7019	-0.00352428	0.0245242	0.124081		89.7236	-0.00261411	0.0236076	0.110784			5	89.3435	89.8553			5	89.3435	89.3564
6	92.0326	0.0119756	-0.166706	0.0432117		6	89.5882	0.00766433	0.0373692	0.161799		89.5283	0.00919449	0.0411119	0.176801			6	89.3363	89.7554			6	89.3363	89.3505
7	92.0111	-0.0252393	-0.160109	0.236416		7	89.4958	-0.0108026	0.0546691	0.154238		89.4798	-0.0100973	0.0550031	0.158974			7	89.3653	89.6837			7	89.3653	89.3875
8	91.9828	-0.0322157	-0.130988	0.486996		8	89.3925	0.0119015	0.00821201	0.210804		89.4051	0.0127085	0.00513139	0.21499			8	89.3997	89.638			8	89.3997	89.4321
9	91.961	0.0633649	0.0653919	0.408857		9	89.3006	-0.00927454	-0.0715921	0.256326		89.2935	-0.0103158	-0.07037	0.250605			9	89.4112	89.4634			9	89.4112	89.4497
10	91.939	-0.0243877	0.364077	0.213541		10	89.1893	0.00634069	-0.0175057	0.197576		89.214	0.00622318	-0.0234966	0.187163			10	89.3798	89.3839			10	89.3798	89.4163
11	91.9096	-0.00410739	0.254144	0.0914774		11	89.074	-0.000477701	0.0711726	0.0960732		89.0874	-0.00136173	0.0711265	0.0990206			11	89.2981	89.2561			11	89.2981	89.325
12	91.8776	0.0456281	0.0359969	-0.089136		12	88.9712	-0.00364062	0.0460515	-0.0118556		88.9719	-0.00469601	0.0539832	-0.0108658			12	89.1719	89.0103			12	89.1719	89.1864
13	91.8559	-0.0665817	-0.133891	-0.132653		13	88.8698	0.00660838	0.00289678	-0.153594		88.8809	0.00734065	0.00498527	-0.142078			13	89.0171	88.7512			13	89.0171	89.0222
14	91.8366	0.0272235	-0.377223	-0.137516		14	88.7318	-0.00778428	-0.0226321	-0.142186		88.7651	-0.00892746	-0.019793	-0.140638			14	88.8539	88.5957			14	88.8539	88.8567
15	91.8141	0.00169242	-0.223952	-0.208318		15	88.5802	0.00503705	-0.0611623	-0.0821369		88.5902	0.00718187	-0.060523	-0.0766035			15	88.7001	88.4603			15	88.7001	88.7077
16	91.7925	-0.0286993	0.0687658	-0.274545		16	88.4317	-0.00248062	-0.0361124	-0.0637416		88.4414	-0.0026167	-0.021914	-0.0687814			16	88.5653	88.3481			16	88.5653	88.5824
17	91.7638	0.0432966	0.137407	-0.18604		17	88.2743	-0.00207782	0.0117645	-0.0240597		88.29	-0.000667849	0.0121157	-0.0316689			17	88.4485	88.2697			17	88.4485	88.4768
18	91.732	-0.0218693	0.218047	-0.0365362		18	88.1308	0.00490137	0.0222909	-0.014534		88.1463	0.00576479	0.0217654	-0.0425112			18	88.3392	88.1313			18	88.3392	88.378
19	91.7015	0.00567203	0.105237	0.110507		19	87.9895	-0.00555614	0.0343543	-0.0122752		88.0138	-0.00610902	0.0349658	-0.0155643			19	88.2218	88.0271			19	88.2218	88.2687
20	91.6693	0.00610588	-0.107991	0.301474		20	87.8383	0.00522321	0.0171246	0.012988		87.8654	0.00621557	0.0116289	0.0116795			20	88.0813	87.8949			20	88.0813	88.1327
21	91.6919	-0.0138029	-0.08229	0.218086		21	87.6854	-0.00159222	-0.0158041	0.0414409		87.7141	-0.00233078	-0.016731	0.0375905			21	87.9089	87.7326			21	87.9089	87.9609
22	91.7371	0.00792587	-0.0224659	0.0382832		22	87.5466	-0.00111943	-0.0132767	0.0361802		87.5716	-0.00056309	-0.0118844	0.0448812			22	87.7044	87.604			22	87.7044	87.7544
23	91.7783	-0.00412491	0.0128132	-0.0842424		23	87.4119	0.00397467	-0.00612131	0.020505		87.4498	0.00429193	-0.00635334	0.0124615			23	87.4764	87.4602			23	87.4764	87.5239
24	91.8342	0.00714203	0.078939	-0.256629		24	87.2748	-0.00540761	0.000950984	0.00976822		87.3139	-0.00591726	0.0115819	0.0202512			24	87.2383	87.3398			24	87.2383	87.2858
25	91.8756	-0.0085432	0.0135521	-0.253088		25	87.1401	0.00387588	0.0139111	-0.0073176		87.18	0.00506259	0.0128132	-0.00778643			25	87.0034	87.19			25	87.0034	87.0548
26	91.9174	0.00930463	-0.0959371	-0.191991		26	86.9973	-0.00243796	0.00112637	0.0318214		87.0377	-0.00244124	0.00078433	0.00744686			26	86.7801	87.0435			26	86.7801	86.8391
27	91.9749	-0.00815588	-0.0442635	-0.189639		27	86.8521	-0.000934063	-0.0198624	0.0924317		86.8913	-1.92177e-05	-0.0182271	0.0877375			27	86.5694	86.9608			27	86.5694	86.6374
28	92.0377	0.00277055	0.0413916	-0.166682		28	86.7096	0.00276126	-0.0118611	0.144085		86.7509	0.0038774	-0.0137227	0.114049			28	86.3654	86.8551			28	86.3654	86.4411
29	92.077	0.00216006	0.0275431	-0.0478302		29	86.5662	-0.0027673	0.00190472	0.207942		86.6084	-0.00365825	0.00189178	0.167773			29	86.1593	86.7744			29	86.1593	86.2387
30	92.1104	-0.0101185	0.00434559	0.11526		30	86.4171	0.00188989	0.0072412	0.110538		86.4618	0.00340698	0.0102602	0.194814			30	85.9443	86.6703			30	85.9443	86.0212
31	92.1505	0.0149301	-0.0379836	0.295079		31	86.2653	0.00234877	0.0147621	-0.0507111		86.3081	0.000699923	0.0143866	-0.0427752			31	85.7208	86.2804			31	85.7208	85.7876
32	92.1881	-0.0172068	-0.103371	0.5129		32	86.113	-0.00531308	0.0307422	-0.192445		86.158	-0.00417951	0.00660353	-0.199308			32	85.4992	85.9611			32	85.4992	85.5485
33	92.2413	0.0165228	0.00101309	0.459394		33	85.9586	0.0087536	0.0504527	-0.37287		86.0048	0.00781898	0.0415117	-0.354			33	85.2995	85.7002			33	85.2995	85.3259
34	92.3006	-0.00940963	0.164803	0.31002		34	85.8056	-0.00986262	-0.00753593	-0.344261		85.854	-0.0100444	-0.00357456	-0.36974			34	85.1471	85.4706			34	85.1471	85.1485
35	92.3568	0.00267684	0.101511	0.211816		35	85.6522	0.00734123	-0.0959415	-0.242773		85.703	0.00800633	-0.11492	-0.252404			35	85.0657	85.3437			35	85.0657	85.0448
36	92.4162	0.00786626	-0.0125873	0.0617297		36	85.4966	-0.00405775	-0.0595409	-0.190194		85.5488	-0.00434298	-0.0579352	-0.176823			36	85.0701	85.3097			36	85.0701	85.0349
37	92.4839	-0.0148214	-0.0543424	-0.0638488		37	85.34	-0.0032832	0.00748315	-0.10214		85.3945	-0.00100944	0.00766011	-0.101103			37	85.1603	85.3001			37	85.1603	85.1234
38	92.5563	0.0187518	-0.11317	-0.197894		38	85.2719	0.00861145	0.03221	0.0133531		85.2403	0.00901906	0.0323814	0.0280042			38	85.3193	85.3097			38	85.3193	85.2951
39	92.6316	-0.0193651	-0.0304412	-0.386297		39	85.2409	-0.0137398	0.0665056	0.151966		85.2689	-0.0123172	0.0658086	0.15657			39	85.5152	85.479			39	85.5152	85.5142
40	92.7113	0.0129282	0.112179	-0.599201		40	85.2049	0.0158549	0.00545355	0.325731		85.2555	0.01531	0.0024127	0.326835			40	85.7077	85.6			40	85.7077	85.7314
41	92.791	-0.00668027	0.0374786	-0.494638		41	85.1936	-0.0131008	-0.0961635	0.528193		85.2226	-0.0137969	-0.0965036	0.536988			41	85.8577	85.6493			41	85.8577	85.8964
42	92.8731	-0.00340057	-0.0866364	-0.272231		42	85.1592	0.00941405	-0.0193463	0.427889		85.2126	0.00891569	-0.0250695	0.422411			42	85.9359	85.6188			42	85.9359	85.9729
43	92.9597	0.0103114	-0.0682873	-0.0893065		43	85.1261	-0.000964227	0.104289	0.215929		85.153	-0.00229461	0.104263	0.208559			43	85.9304	85.4635			43	85.9304	85.9508
44	93.0493	-0.0140635	-0.0354885	0.165657		44	85.1193	-0.00525451	0.0740842	0.0470087		85.1216	-0.00620265	0.0804179	0.0490695			44	85.849	85.2449			44	85.849	85.8478
45	93.1417	0.0152914	0.0285741	0.208286		45	85.122	0.0110146	0.0192554	-0.187982		85.1301	0.010674	0.0205168	-0.183962			45	85.7164	84.9773			45	85.7164	85.7013
46	93.2371	-0.0104455	0.127796	0.190145		46	85.0902	-0.0136502	-0.034004	-0.206954		85.1249	-0.0148502	-0.0349059	-0.211351			46	85.567	84.8638			46	85.567	85.553
47	93.3356	0.00618401	0.0603204	0.255418		47	85.051	0.0108864	-0.114425	-0.160414		85.0558	0.0125066	-0.113639	-0.154017			47	85.4347	84.8007			47	85.4347	85.4354
48	93.4371	9.70164e-05	-0.0582982	0.305223		48	85.0231	-0.00739382	-0.0617936	-0.19124		85.0287	-0.00806569	-0.0536141	-0.19812			48	85.3434	84.7689			48	85.3434	85.3654
49	93.5422	-0.00409067	-0.0431946	0.21695		49	84.993	-0.000684838	0.034889	-0.201411		84.9954	0.00181918	0.0348712	-0.200281			49	85.3004	84.8318			49	85.3004	85.3436
50	93.6505	0.00457254	-0.0128104	0.0715088		50	84.988	0.00641552	0.039205	-0.156155		84.9835	0.00721696	0.0403608	-0.11045			50	85.2942	84.9206			50	85.2942	85.3558
51	93.7618	-0.00422546	-0.0130772	-0.0833289		51	84.9939	-0.0109921	0.0389513	-0.0858277		85.0002	-0.0106944	0.0401818	-0.0876009			51	85.2988	84.9421			51	85.2988	85.3749
52	93.8763	5.68717e-05	-0.00506541	-0.283575		52	84.9964	0.0128088	0.00277836	0.00287617		85.0076	0.0132555	0.00502219	-0.00385756			52	85.2812	85.022			52	85.2812	85.3671
53	93.8515	0.00258191	0.00785122	-0.220918		53	85.0052	-0.00930319	-0.0606002	0.117017		85.0167	-0.010331	-0.0615007	0.0722407			53	85.211	85.0171			53	85.211	85.3003
54	93.7693	-0.00446327	0.0234887	-0.0686706		54	84.9149	0.0055003	-0.0147033	0.114148		85.0391	0.0064376	-0.00891256	0.135601			54	85.0693	85.1722			54	85.0693	85.155
55	93.6965	0.00467319	0.0158866	0.0251612		55	84.7849	0.0016644	0.0611375	0.0753572		84.8291	0.000782443	0.0610391	0.0597137			55	84.8529	84.9506			55	84.8529	84.931
56	93.5859	-0.000876453	0.000190548	0.163959		56	84.6658	-0.00682932	0.0496491	0.0680892		84.6632	-0.00726102	0.0668018	0.0755238			56	84.5751	84.7983			56	84.5751	84.648
57	93.513	-0.00240256	-0.00812727	0.153023		57	84.5222	0.0101432	0.0266055	0.0450106		84.5357	0.0097738	0.0281204	0.0512812			57	84.2608	84.6248			57	84.2608	84.3372
58	93.4394	0.00765748	-0.0195594	0.093261		58	84.4075	-0.0117431	-0.0212333	0.0732241		84.3828	-0.0121841	-0.0207031	0.0964779			58	83.9402	84.4464			58	83.9402	84.0298
59	93.3253	-0.0106004	0.0151817	0.0860386		59	84.2949	0.00948091	-0.0942845	0.119191		84.3086	0.00956743	-0.0926996	0.111437			59	83.6416	84.3369			59	83.6416	83.749
60	93.1976	0.0109461	0.0688913	0.0624361		60	84.1557	-0.00729977	-0.0316045	0.14683		84.2164	-0.00654617	-0.0563024	0.105123			60	83.3863	84.2587			60	83.3863	83.5093
61	93.1267	-0.00968033	0.00399864	0.0106211		61	84.0094	0.00409195	0.0743882	0.180422		84.0722	0.00300613	0.0749575	0.111258			61	83.1874	84.2614			61	83.1874	83.32
62	93.0695	0.00414829	-0.0975807	-0.0553108		62	83.9112	-0.00157977	0.0314721	0.0814489		83.9485	4.80891e-05	0.0332678	0.170235			62	83.0506	84.1521			62	83.0506	83.1896
63	92.9954	0.000634544	-0.0638371	-0.136565		63	83.8275	0.000880302	-0.0401349	-0.0730816		83.9081	-0.000767716	-0.0412429	-0.0651029			63	82.9774	83.801			63	82.9774	83.1264
64	92.9265	-0.00680729	-0.00226442	-0.233942		64	83.7339	0.000113682	-0.018943	-0.21588		83.8177	0.00164504	-0.0416142	-0.228712			64	82.9678	83.549			64	82.9678	83.1368
65	92.8188	0.0107119	0.0324294	-0.194893		65	83.6479	-0.000518793	0.0125218	-0.393759		83.7402	4.10946e-05	0.012356	-0.36212			65	83.0211	83.3905			65	83.0211	83.2222
66	92.6953	-0.0119936	0.0830566	-0.106974		66	83.5354	0.00159813	0.00968748	-0.361674		83.6465	0.00219608	0.0145604	-0.406713			66	83.1347	83.2566			66	83.1347	83.3773
67	92.5786	0.0116579	0.0239341	-0.0417479		67	83.4142	-0.00484131	0.00689933	-0.255447		83.5115	-0.00248187	0.0062405	-0.269922			67	83.3007	83.2453			67	83.3007	83.5891
68	92.4534	-0.0075999	-0.0772661	0.0511696		68	83.302	0.00725961	-0.0280316	-0.194494		83.3883	0.00665177	-0.00131006	-0.179516			68	83.5034	83.2141			68	83.5034	83.8358
69	92.3296	0.00379014	-0.0273715	0.0724959		69	83.1867	-0.0110007	-0.0802493	-0.0958268		83.2756	-0.00925896	-0.0866022	-0.0955046			69	83.718	83.0842			69	83.718	84.0862
70	92.2031	0.00143527	0.055474	0.0739341		70	83.1947	0.0124259	0.000411972	0.0236658		83.1535	0.0114218	-0.00390291	0.037377			70	83.9136	83.1984			70	83.9136	84.3027
71	92.0677	-0.00518936	0.0411012	0.106944		71	83.2546	-0.0109947	0.126109	0.164899		83.3165	-0.0114376	0.125752	0.170634			71	84.0582	83.6014			71	84.0582	84.4472
72	91.9274	0.00742206	0.0168029	0.136487		72	83.3061	0.00825534	0.0626193	0.343913		83.4334	0.00768631	0.0690704	0.346258			72	84.1268	83.8564			72	84.1268	84.4926
73	91.7808	-0.00844502	-0.0174246	0.122653		73	83.3914	-0.000911919	-0.0461934	0.551397		83.5041	-0.00195714	-0.0443724	0.558906			73	84.1082	84.0167			73	84.1082	84.4322
74	91.6282	0.00704027	-0.0708225	0.0920794		74	83.4466	-0.00486838	-0.0395298	0.456165		83.6114	-0.00500575	-0.0471245	0.449897			74	84.009	84.0092			74	84.009	84.2836
75	91.4708	-0.00551491	-0.0264309	0.0600386		75	83.504	0.0114202	-0.0250032	0.249469		83.6241	0.0110233	-0.0250182	0.243682			75	83.8533	83.8538			75	83.8533	84.084
76	91.3078	0.00285391	0.0495349	0.0149361		76	83.5976	-0.0149327	0.0169195	0.0855963		83.6661	-0.0155405	0.014441	0.0938792			76	83.6777	83.7589			76	83.6777	83.8791
77	91.129	-0.000831991	0.0226942	-0.0231126		77	83.7044	0.0140339	0.0864115	-0.144343		83.7801	0.0141707	0.0861551	-0.132695			77	83.522	83.7477			77	83.522	83.7106
78	90.9402	-0.000593889	-0.0227393	-0.0644362		78	83.7578	-0.0117338	0.0078198	-0.187759		83.8801	-0.012237	0.00755822	-0.185548			78	83.4202	83.6899			78	83.4202	83.6083
79	90.7465	0.00146483	-0.0106442	-0.119597		79	83.7985	0.00465753	-0.117961	-0.178234		83.8735	0.00556605	-0.119231	-0.172345			79	83.3926	83.5875			79	83.3926	83.5877
80	90.5442	-0.00115136	0.00633006	-0.181432		80	83.8554	0.00102898	-0.0703767	-0.244801		83.9237	0.00218717	-0.0712741	-0.252465			80	83.4421	83.6021			80	83.4421	83.6501
81	90.3392	0.00084407	0.0053309	-0.149565		81	83.9077	-0.00690811	0.0131798	-0.299186		83.961	-0.00697118	0.0119105	-0.29455			81	83.5551	83.6714			81	83.5551	83.7826
82	90.1284	-2.79722e-05	0.00506224	-0.0824197		82	83.9964	0.0104884	0.0389377	-0.254068		84.0293	0.0115973	0.0364054	-0.212736			82	83.7068	83.8646			82	83.7068	83.9582
83	89.909	-0.000414187	0.00262753	-0.026335		83	84.1	-0.010344	0.075317	-0.168961		84.15	-0.0105073	0.0764565	-0.16846			83	83.8679	84.0475			83	83.8679	84.141
84	89.6829	0.000408357	-0.00228971	0.0514972		84	84.1974	0.00935966	0.0251295	-0.0761385		84.2584	0.0101533	0.0219745	-0.0785829			84	84.0123	84.2119			84	84.0123	84.2954
85	89.6655	-0.000179653	-0.00220543	0.0662656		85	84.3029	-0.00534935	-0.0630348	0.0492434		84.3649	-0.00537218	-0.0623204	0.0202542			85	84.1217	84.3175			85	84.1217	84.3968
86	89.733	-0.000793962	-0.00138573	0.0632205		86	84.2523	0.00221164	-0.0258096	0.0938125		84.4872	0.00144751	-0.0292279	0.129377			86	84.1875	84.5888			86	84.1875	84.4383
87	89.7846	0.00151928	-0.00785613	0.0853189		87	84.1384	0.0005614	0.0378055	0.120071		84.237	0.00116271	0.0379201	0.108924			87	84.2098	84.3851			87	84.2098	84.4299
88	89.8911	-0.00245494	-0.0165542	0.10309		88	84.0397	-0.0022981	0.0171052	0.183579		84.0475	-0.00381529	0.0418605	0.181656			88	84.1938	84.2672			88	84.1938	84.3889
89	89.9382	0.00281442	0.00115556	0.100235		89	83.9013	0.00184592	-0.0138269	0.245798		83.9113	0.00325552	-0.0141384	0.230398			89	84.1459	84.1309			89	84.1459	84.3296
90	89.984	-0.00253366	0.0282859	0.089237		90	83.8065	-0.0014174	-0.0107643	0.216346		83.7457	-0.00180208	-0.0112695	0.245859			90	84.0707	83.9785			90	84.0707	84.2569
91	90.0893	0.0018501	0.0149069	0.0748494		91	83.7134	-0.000107226	-0.00696003	0.15123		83.7102	0.00130455	-0.00651065	0.153301			91	83.9695	83.8583			91	83.9695	84.1672
92	90.213	-8.04466e-05	-0.00849776	0.0530198		92	83.5773	0.000794645	-0.00350323	0.0890279		83.6495	0.00137451	0.00404071	0.0792058			92	83.8406	83.7341			92	83.8406	84.0529
93	90.2493	-0.00142392	-0.0084636	0.00519426		93	83.4284	-0.000559108	0.00375298	0.00164609		83.5057	-0.000396158	0.0507306	0.00900036			93	83.6814	83.5651			93	83.6814	83.9073
94	90.2632	0.00354203	-0.00744396	-0.0575388		94	83.3529	-0.000245879	0.00244634	-0.0512568		83.3879	0.000825389	0.000719842	-0.0688472			94	83.4911	83.3206			94	83.4911	83.7285
95	90.3005	-0.00469794	0.00901844	-0.126882		95	83.2982	0.00272851	-0.00076011	-0.10098		83.3996	0.00191902	-0.000710965	-0.100532			95	83.2736	83.3003			95	83.2736	83.5207
96	90.328	0.00514049	0.0349954	-0.208776		96	83.2266	-0.00474595	0.0213412	-0.178232		83.3322	-0.00351587	0.0121942	-0.18976			96	83.0387	83.1511			96	83.0387	83.2953
97	90.412	-0.0046147	0.00191067	-0.197701		97	83.1652	0.00745855	0.0524139	-0.262057		83.2853	0.00606478	0.0515645	-0.247903			97	82.8031	83.095			97	82.8031	83.07
98	90.5179	0.00215383	-0.0502108	-0.15365		98	83.0611	-0.0088149	-0.00205883	-0.209848		83.211	-0.0079602	-0.00194912	-0.23906			98	82.5885	82.9621			98	82.5885	82.8679
99	90.6113	0.000256483	-0.037159	-0.126653		99	82.9417	0.00898683	-0.0860469	-0.105752		83.0662	0.00780422	-0.0867897	-0.114049			99	82.4187	82.8732			99	82.4187	82.7142
100	90.7158	-0.00425946	-0.011551	-0.0816142		100	82.8347	-0.00791162	-0.0320209	-0.0145434		82.9363	-0.00737658	-0.0457833	-0.0172226			100	82.3157	82.8659			100	82.3157	82.6336
101	90.7505	0.00686938	0.0169583	-0.0048313		101	82.7213	0.00430673	0.0578401	0.109901		82.8225	0.00448568	0.0573044	0.0945184			101	82.2953	82.9788			101	82.2953	82.6457
102	90.7592	-0.00876697	0.0594873	0.0921073		102	82.7202	-0.000762425	0.0263635	0.1129		82.6949	1.73485e-05	0.0338756	0.151472			102	82.3632	82.8803			102	82.3632	82.76
103	90.7823	0.00902892	0.0169135	0.206218		103	82.7652	-0.0046627	-0.025335	0.0784336		82.8439	-0.00329611	-0.0258417	0.0787695			103	82.513	82.8935			103	82.513	82.9701
104	90.7919	-0.00623591	-0.0549943	0.340441		104	82.7988	0.00844918	-0.0387229	0.0835063		82.9534	0.00914982	-0.0363067	0.0910413			104	82.7264	83.0173			104	82.7264	83.2518
105	90.825	0.00330633	-0.0179335	0.267849		105	82.8611	-0.0113577	-0.0581343	0.0749862		83.0042	-0.0103741	-0.0582295	0.0776177			105	82.9756	83.0133			105	82.9756	83.5646
106	90.8633	0.00218972	0.0427352	0.118502		106	82.8939	0.012346	0.0101144	0.04572		83.0906	0.012188	0.0146899	0.0878292			106	83.2289	83.2053			106	83.2289	83.8599
107	90.8869	-0.00588307	0.0386258	-0.000971338		107	82.9264	-0.00988492	0.116896	0.00544332		83.0772	-0.0103899	0.157903	0.0120516			107	83.4568	83.2367			107	83.4568	84.0942
108	90.909	0.00853098	0.029555	-0.165602		108	82.9897	0.00710278	0.0542676	-0.0476954		83.0836	0.00635228	0.0651925	-0.0448486			108	83.6374	83.1103			108	83.6374	84.2408
109	90.9779	-0.00921296	-0.0148415	-0.154497		109	83.0628	-0.00146813	-0.0531054	-0.113663		83.1626	-0.00193972	-0.0509204	-0.113575			109	83.7611	82.9961			109	83.7611	84.2974
110	91.0645	0.00577163	-0.0834533	-0.0866155		110	83.0806	-0.00246637	-0.0363956	-0.0825509		83.2265	-0.00380787	-0.0437321	-0.0886633			110	83.8308	83.0903			110	83.8308	84.2842
111	91.1476	-0.00249729	-0.0519795	-0.0728187		111	83.0826	0.00549497	-0.00579532	-0.0175049		83.1834	0.00655557	-0.00497283	-0.010921			111	83.8594	83.174			111	83.8594	84.2343
112	91.2424	-0.00351336	0.00699226	-0.0368199		112	83.0975	-0.00661117	-0.00146703	0.0299727		83.1917	-0.00804388	0.00784942	0.0261975			112	83.8642	83.2177			112	83.8642	84.1799
113	91.3201	0.00717525	0.0283639	0.00907585		113	83.1046	0.00377488	0.0113309	0.0961566		83.1835	0.00658843	0.0109623	0.0938126			113	83.8599	83.2948			113	83.8599	84.1416
114	91.3956	-0.00865913	0.0572208	0.0638599		114	83.1437	-0.00104774	0.00325057	0.0734675		83.1999	-0.00160287	0.00371295	0.094689			114	83.8528	83.2967			114	83.8528	84.1232
115	91.484	0.00824028	0.0284594	0.14077		115	83.1942	-0.00434037	-0.0125263	0.0198689		83.2704	-0.00177069	-0.0130659	0.0192068			115	83.8373	83.2748			115	83.8373	84.1121
116	91.575	-0.00281279	-0.0252921	0.232308		116	83.2353	0.0074916	-0.0258862	-0.0106734		83.3285	0.00793534	0.00101727	-0.00479167			116	83.7966	83.3327			116	83.7966	84.0842
117	91.6446	-0.00168597	-0.0200402	0.140513		117	83.2812	-0.00881871	-0.0440351	-0.0553006		83.3776	-0.00861326	-0.0441919	-0.0470036			117	83.7073	83.2778			117	83.7073	84.0099
118	91.7077	0.0081376	-0.00749453	-0.0200935		118	83.2305	0.00806966	0.00458974	-0.0436787		83.4375	0.00889675	-0.00607502	-0.0554081			118	83.5464	83.3849			118	83.5464	83.8623
119	91.7746	-0.0116911	0.0185916	-0.157477		119	83.14	-0.00271394	0.0796384	-0.012282		83.2603	-0.00425726	0.0809329	-0.0154581			119	83.2993	83.3215			119	83.2993	83.626
120	91.8377	0.0114524	0.0601051	-0.336638		120	83.0585	-0.00229722	0.0667746	0.00229241		83.1152	-0.000948996	0.0762606	0.00782292			120	82.9664	83.1984			120	82.9664	83.3033
121	91.9124	-0.00967142	0.000865229	-0.282046		121	82.9519	0.00992904	0.0359576	0.0249319		83.0113	0.00785212	0.036176	0.0196531			121	82.5655	83.075			121	82.5655	82.9161
122	91.9906	0.00258455	-0.0925816	-0.145112		122	82.8704	-0.0149154	-0.0289991	0.0511075		82.8844	-0.0143849	-0.0293895	0.0293744			122	82.1308	82.87			122	82.1308	82.5015
123	92.0646	0.00286694	-0.0640335	-0.0613177		123	82.7888	0.0178246	-0.126204	0.0807857		82.8455	0.0151267	-0.126698	0.0806747			123	81.7074	82.8146			123	81.7074	82.1039
124	92.1396	-0.00879908	-0.0102753	0.0632038		124	82.6802	-0.0180795	-0.0300047	0.118526		82.7938	-0.0180095	-0.0575152	0.10188			124	81.343	82.8202			124	81.343	81.7686
125	92.224	0.0119156	0.0326787	0.0909239		125	82.5627	0.0134449	0.129761	0.161714		82.6827	0.0119582	0.129474	0.151861			125	81.0791	82.976			125	81.0791	81.5381
126	92.3125	-0.010117	0.0957673	0.0909138		126	82.4914	-0.00836012	0.0387792	0.0839118		82.5839	-0.00766773	0.0483795	0.126204			126	80.9429	82.7508			126	80.9429	81.4503
127	92.4016	0.00772316	0.0474697	0.136815		127	82.4326	-0.000151662	-0.108628	-0.0419647		82.5678	-4.66289e-05	-0.107941	-0.0385508			127	80.9426	82.4213			127	80.9426	81.5308
128	92.4939	-0.00112404	-0.0399312	0.179007		128	82.3625	0.00668132	-0.0793035	-0.156923		82.5037	0.00858649	-0.0869813	-0.154777			128	81.067	82.2706			128	81.067	81.7815
129	92.5836	-0.00330373	-0.0331737	0.104587		129	82.2983	-0.0124628	-0.027774	-0.302574		82.4535	-0.0113929	-0.0272527	-0.295332			129	81.2878	82.1195			129	81.2878	82.17
130	92.6737	0.00606448	-0.0164711	-0.0163266		130	82.2064	0.0156059	0.0350741	-0.258664		82.3859	0.016435	0.041316	-0.274292			130	81.5665	82.1694			130	81.5665	82.6307
131	92.7673	-0.00687737	-0.0116924	-0.135688		131	82.1044	-0.0147128	0.131858	-0.147324		82.2676	-0.0144385	0.131523	-0.151057			131	81.862	82.2337			131	81.862	83.0817
132	92.8622	0.00250336	0.00264357	-0.288525		132	82.0096	0.0127109	0.0486865	-0.075843		82.156	0.0124363	0.0525366	-0.0733727			132	82.1388	82.1476			132	82.1388	83.4481
133	92.9707	0.000902439	0.00687775	-0.190764		133	81.9101	-0.00691764	-0.0939543	0.0303489		82.0571	-0.0080194	-0.0925981	0.0216946			133	82.3723	81.9782			133	82.3723	83.6855
134	93.086	-0.00614554	0.0100297	-0.00189726		134	81.9211	0.00227403	-0.0417856	0.0722281		81.9509	0.000318271	-0.0429119	0.0744928			134	82.5523	81.9828			134	82.5523	83.7902
135	93.2021	0.0085866	-0.00514201	0.141525		135	81.9776	0.00269438	0.0463503	0.0987877		82.107	0.00301213	0.0466534	0.0972715			135	82.6823	82.2539			135	82.6823	83.7941
136	93.3233	-0.00690162	-0.0296872	0.334839		136	82.0246	-0.00563031	0.0277466	0.163735		82.2237	-0.0075804	0.0434257	0.16408			136	82.7751	82.4237			136	82.7751	83.7462
137	93.4434	0.00414273	-0.00171207	0.318583		137	82.1006	0.00539862	0.00120843	0.231028		82.2959	0.00782788	0.000740183	0.231705			137	82.8471	82.5362			137	82.8471	83.692
138	93.5656	0.00374571	0.0422775	0.231723		138	82.1477	-0.00443893	-0.0124158	0.177294		82.3949	-0.0053357	-0.0107845	0.15772			138	82.9117	82.5365			138	82.9117	83.6595
139	93.693	-0.00931792	0.0573645	0.205185		139	82.195	0.000235242	-0.0355659	0.0772266		82.3945	0.00337405	-0.0360459	0.0711727			139	82.9748	82.433			139	82.9748	83.6555
140	93.8235	0.0146703	0.0732194	0.149036		140	82.2736	0.00263319	-0.0292142	-0.0148899		82.4154	0.00292675	-0.00346202	-0.021102			140	83.0323	82.3938			140	83.0323	83.669
141	93.9503	-0.0165603	-0.0163454	0.0218633		141	82.3625	-0.00525061	-0.0134062	-0.138151		82.5063	-0.00444366	-0.0140571	-0.128421			141	83.0721	82.3593			141	83.0721	83.6787
142	94.0775	0.0127824	-0.153467	-0.143019		142	82.4007	0.00604519	0.0135977	-0.123235		82.5886	0.00693136	0.00684352	-0.136796			142	83.0782	82.4656			142	83.0782	83.6606
143	94.2081	-0.00792962	-0.0834569	-0.335011		143	82.4256	-0.00330553	0.0529207	-0.0632782		82.5739	-0.00443334	0.0546228	-0.0586702			143	83.0373	82.5654			143	83.0373	83.5957
144	94.3399	-0.00208904	0.0412381	-0.56373		144	82.4635	0.000504695	0.0422036	-0.0414557		82.6061	0.00177821	0.0388519	-0.0461637			144	82.9445	82.6005			144	82.9445	83.4766
145	94.4771	0.00978321	0.0508032	-0.496147		145	82.4954	0.00503814	0.017153	-0.000120922		82.6197	0.00368862	0.0162786	-0.00193746			145	82.8067	82.6378			145	82.8067	83.312
146	94.6175	-0.0171587	0.0589401	-0.32257		146	82.5588	-0.00855913	-0.0197846	-0.00482605		82.6588	-0.00817487	-0.0225336	-0.00830085			146	82.6431	82.6198			146	82.6431	83.1249
147	94.759	0.0209802	-0.0175299	-0.200002		147	82.634	0.0105873	-0.0737957	-0.0240154		82.7518	0.00997401	-0.0740638	-0.019981			147	82.4805	82.6677			147	82.4805	82.9472
148	94.903	-0.0198585	-0.14286	-0.0180926		148	82.7017	-0.0106428	-0.0249797	-0.0213242		82.8355	-0.0110414	-0.0135368	-0.0174611			148	82.3478	82.7934			148	82.3478	82.8112
149	94.9016	0.0167727	-0.018344	0.0971737		149	82.7752	0.00633329	0.0583294	-0.0209856		82.9123	0.0072227	0.057056	-0.0125687			149	82.2674	82.964			149	82.2674	82.7415
150	94.8396	-0.0086785	0.180626	0.20649		150	82.7754	-0.0023178	0.0230946	-0.00517233		82.9985	-0.00189734	0.0272188	-0.00764688			150	82.25	83.0162			150	82.25	82.7498
151	94.7865	0.00132986	0.105059	0.379703		151	82.7462	-0.00408939	-0.0355282	0.0184399		82.8976	-0.00296571	-0.0353089	0.00910512			151	82.2914	82.8684			151	82.2914	82.8315
152	94.6934	0.00774112	-0.0259761	0.570259		152	82.7261	0.00821771	-0.0372609	0.0391235		82.8216	0.00930574	-0.043335	0.0482401			152	82.3734	82.8358			152	82.3734	82.9656
153	94.6383	-0.014106	-0.0568671	0.46477		153	82.6883	-0.0100443	-0.0382996	0.0638543		82.7809	-0.0102147	-0.0381105	0.0565804			153	82.47	82.7892			153	82.47	83.1176
154	94.5816	0.0184848	-0.100211	0.248208		154	82.6714	0.0100874	0.012057	0.0656944		82.7231	0.0108387	0.0186395	0.085601			154	82.5536	82.8382			154	82.5536	83.2479
155	94.4819	-0.0198947	-0.00954538	0.062871		155	82.6561	-0.00575135	0.0906313	0.0593812		82.7363	-0.00674257	0.0907814	0.0652993			155	82.6033	82.8857			155	82.6033	83.3235
156	94.3671	0.016868	0.142909	-0.192579		156	82.6216	0.00195339	0.0524519	0.0582211		82.7407	0.00230497	0.058451	0.0467358			156	82.6098	82.8482			156	82.6098	83.3296
157	94.311	-0.0125571	0.0311782	-0.216907		157	82.582	0.00347309	-0.0167405	0.053009		82.7002	0.00309176	-0.0145583	0.0478193			157	82.5774	82.7366			157	82.5774	83.2742
158	94.2683	0.0037186	-0.149818	-0.172442		158	82.5809	-0.00685464	-0.0305856	0.0154173		82.6706	-0.00776705	-0.0272109	0.0509553			158	82.5212	82.6866			158	82.5212	83.1843
159	94.2071	0.00347827	-0.100976	-0.210273		159	82.5917	0.00766096	-0.0477766	-0.0373049		82.7116	0.00824057	-0.0475196	-0.0334218			159	82.4623	82.6389			159	82.4623	83.0945
160	94.1505	-0.011876	-0.0147721	-0.22641		160	82.5954	-0.00723936	-0.0193318	-0.0927847		82.7181	-0.00794143	-0.00704975	-0.0904373			160	82.4211	82.6127			160	82.4211	83.0342
161	94.0526	0.0166166	0.0468536	-0.13083		161	82.6056	0.00328815	0.0328237	-0.159957		82.7375	0.00485466	0.0325584	-0.151129			161	82.4111	82.6237			161	82.4111	83.0196
162	93.9374	-0.017213	0.139867	0.0137378		162	82.5959	-6.49306e-05	0.0173423	-0.134864		82.7433	0.000345718	0.0166666	-0.162622			162	82.4361	82.5977			162	82.4361	83.0525
163	93.8286	0.0152715	0.0589727	0.175291		163	82.58	-0.00379315	-0.010975	-0.0762837		82.7122	-0.00313404	-0.0115643	-0.0745521			163	82.4891	82.6229			163	82.4891	83.1216
164	93.71	-0.00667814	-0.0838131	0.378858		164	82.5718	0.00607339	-0.0155907	-0.0338071		82.6894	0.00689796	-0.0153851	-0.0272698			164	82.5559	82.6536			164	82.5559	83.2073
165	93.7183	-0.000679297	-0.0459815	0.257412		165	82.5618	-0.00591018	-0.0232986	0.02728		82.6758	-0.00616009	-0.0234597	0.0248703			165	82.6194	82.671			165	82.6194	83.2864
166	93.7768	0.0107445	0.0212843	0.0191609		166	82.5464	0.00513439	0.00344339	0.0457291		82.6574	0.00587519	0.00409071	0.0460158			166	82.6649	82.7133			166	82.6649	83.3383
167	93.8197	-0.0167415	0.047935	-0.161451		167	82.5288	-0.00198743	0.0459045	0.0530519		82.6414	-0.00213835	0.0461681	0.0538727			167	82.6834	82.7393			167	82.6834	83.3512
168	93.8929	0.0181898	0.0902227	-0.40669		168	82.5096	-0.000373345	0.0258873	0.08135		82.632	-0.000323578	0.037659	0.0840178			168	82.6737	82.7533			168	82.6737	83.3251
169	93.928	-0.0167689	-0.0072243	-0.373994		169	82.4881	0.00247027	-0.00970015	0.108844		82.6075	0.00291031	-0.00950526	0.109618			169	82.6411	82.7105			169	82.6411	83.2708
170	93.9596	0.00790603	-0.161101	-0.247219		170	82.4686	-0.00360472	-0.0160339	0.0933069		82.5902	-0.00417118	-0.0145931	0.110643			170	82.5944	82.6821			170	82.5944	83.2045
171	94.024	-0.000263282	-0.102689	-0.198869		171	82.4488	0.00263427	-0.0238324	0.0613042		82.5721	0.00366311	-0.0234952	0.0578263			171	82.5426	82.6101			171	82.5426	83.1407
172	94.0967	-0.00997086	0.00481067	-0.110371		172	82.4264	-0.00176524	-0.0130073	0.0304913		82.5495	-0.00172222	-0.00396067	0.0289267			172	82.4915	82.5728			172	82.4915	83.0877
173	94.1043	0.0163108	0.0545557	0.00624781		173	82.403	-0.000183798	0.00815345	-0.0120878		82.5298	0.000537376	0.00803114	-0.0120829			173	82.4426	82.5263			173	82.4426	83.0457
174	94.0917	-0.0179486	0.125209	0.145342		174	82.3771	0.00122801	0.00904004	-0.0300321		82.5074	0.002059	0.00872058	-0.0281658			174	82.3933	82.49			174	82.3933	83.0092
175	94.0907	0.0170446	0.0436344	0.324159		175	82.3494	-0.000978816	0.00811547	-0.0428821		82.4793	-0.00144715	0.00767219	-0.0357804			175	82.3397	82.4497			175	82.3397	82.9707
176	94.0782	-0.00950865	-0.0990299	0.533389		176	82.3207	0.000391784	0.0127009	-0.0689649		82.4503	0.00148179	0.00107961	-0.0728194			176	82.2796	82.38			176	82.2796	82.9248
177	94.0992	0.00299658	-0.0413229	0.418854		177	82.2905	0.00204782	0.0166353	-0.0956824		82.4218	0.00126512	0.016354	-0.0892633			177	82.2151	82.3502			177	82.2151	82.872
178	94.1303	0.00540236	0.0568947	0.185017		178	82.2591	-0.00358609	-0.00419418	-0.0833241		82.3911	-0.00284849	-0.00127461	-0.10816			178	82.1539	82.2788			178	82.1539	82.8199
179	94.1482	-0.010749	0.0510952	-0.00306339		179	82.2265	0.00485945	-0.0352823	-0.0560377		82.361	0.00482091	-0.0660284	-0.0544239			179	82.108	82.2454			179	82.108	82.7822
180	94.1687	0.012352	0.0412379	-0.261865		180	82.1923	-0.00499407	-0.0135971	-0.0311983		82.33	-0.00490959	-0.00306315	-0.0238131			180	82.0909	82.2982			180	82.0909	82.7748
181	94.0898	-0.0119428	-0.0173278	-0.240397		181	82.1568	0.00272066	0.0231134	0.00373303		82.2961	0.00369673	0.0220474	0.00473456			181	82.113	82.3266			181	82.113	82.811
182	93.9685	0.00665681	-0.109535	-0.127972		182	82.2097	-0.000576168	0.0106391	0.0229415		82.2615	-0.000322995	0.0130775	0.0209429			182	82.1785	82.2952			182	82.1785	82.8962
183	93.8541	-0.00191148	-0.066222	-0.100475		183	82.2993	-0.0032166	-0.0101341	0.0399301		82.4229	-0.00210546	-0.0102661	0.0383809			183	82.2829	82.4489			183	82.2829	83.025
184	93.7122	-0.00463407	0.0138312	-0.0368128		184	82.3838	0.00555248	-0.0181623	0.0680241		82.5494	0.00623306	-0.014857	0.0723813			184	82.4138	82.6132			184	82.4138	83.1804
185	93.5929	0.00883129	0.0355602	0.0271986		185	82.4925	-0.00649515	-0.0298646	0.0981382		82.6611	-0.00650652	-0.0302043	0.0962404			185	82.5541	82.7206			185	82.5541	83.3381
186	93.4711	-0.0110816	0.0640396	0.0993131		186	82.5781	0.00628651	0.00483751	0.0821965		82.7853	0.0069074	0.00787311	0.11964			186	82.6865	82.9197			186	82.6865	83.4726
187	93.32	0.0110009	0.0187624	0.208174		187	82.6647	-0.0030129	0.0589124	0.0487807		82.8386	-0.00373593	0.0794104	0.0503968			187	82.7985	82.9647			187	82.7985	83.5661
188	93.1576	-0.00688223	-0.0609106	0.336505		188	82.7775	0.00032383	0.0378029	0.0195301		82.9135	0.000587448	0.0325941	0.0168481			188	82.8864	82.9636			188	82.8864	83.6143
189	93.0399	0.00228079	-0.0212761	0.193628		189	82.8994	0.00350891	-0.00130541	-0.0210136		83.0342	0.00339433	-0.000302585	-0.0222016			189	82.9559	83.0151			189	82.9559	83.6287
190	92.9329	0.00597195	0.045195	-0.0516316		190	82.9862	-0.0055729	-0.0193767	-0.0322541		83.1505	-0.00620369	-0.0169113	-0.0326321			190	83.02	83.0947			190	83.02	83.6319
191	92.8121	-0.0119045	0.0692438	-0.264752		191	83.065	0.00534862	-0.0448926	-0.0358773		83.1975	0.00641011	-0.0451594	-0.0310762			191	83.0946	83.1277			191	83.0946	83.6502
192	92.6951	0.0179924	0.100451	-0.540892		192	83.155	-0.00415852	-0.0272004	-0.0524212		83.2811	-0.00487457	-0.00796835	-0.0534456			192	83.1927	83.2148			192	83.1927	83.7035
193	92.5477	-0.0201438	-0.0163756	-0.51777		193	83.2424	-0.000266054	0.0076156	-0.0677902		83.3528	0.0017984	0.00772374	-0.0632777			193	83.319	83.299			193	83.319	83.799
194	92.3879	0.01718	-0.197328	-0.39344		194	83.3548	0.00369019	0.0160003	-0.0656609		83.4475	0.00377495	0.0134902	-0.0774702			194	83.4677	83.3873			194	83.4677	83.9288
195	92.2331	-0.0120898	-0.10398	-0.346996		195	83.4778	-0.0076656	0.0257382	-0.0569037		83.5793	-0.00631087	0.0254117	-0.0516526			195	83.6222	83.5467			195	83.6222	84.071
196	92.0715	-0.000211455	0.0603574	-0.254576		196	83.5971	0.00963186	-0.0067473	-0.0477875		83.7042	0.0098073	0.0035084	-0.0387076			196	83.7588	83.6788			196	83.7588	84.195
197	92.0162	0.0100383	0.0631812	-0.038152		197	83.7223	-0.00882648	-0.0593634	-0.0335597		83.8291	-0.00878477	-0.0599006	-0.0254836			197	83.8521	83.735			197	83.8521	84.2694
198	92.0033	-0.0219204	0.0595933	0.244332		198	83.709	0.00697914	-0.00765474	-0.00415372		83.9633	0.00716923	-0.00996221	-0.0224149			198	83.8813	83.938			198	83.8813	84.2704
199	91.9788	0.0281912	-0.032414	0.568444		199	83.6391	-0.00190623	0.0745393	0.0341439		83.7684	-0.00248403	0.0748866	0.0322595			199	83.8354	83.873			199	83.8354	84.1891
200	91.9805	-0.0276678	-0.182151	0.954356		200	83.5814	-0.00231959	0.0533067	0.0770813		83.6254	-0.00229713	0.072115	0.0810558			200	83.7163	83.7763			200	83.7163	84.0339
201	91.9515	0.0235809	-0.0174918	0.841866		201	83.4878	0.00717284	0.0133991	0.127767		83.5226	0.00656877	0.0141873	0.124906			201	83.5384	83.6682			201	83.5384	83.8272
202	91.9205	-0.00957478	0.244526	0.550677		202	83.4322	-0.0101552	-0.0251366	0.110703		83.3995	-0.0103896	-0.0254241	0.149929			202	83.3256	83.5136			202	83.3256	83.5988
203	91.9178	-0.00235183	0.159126	0.34528		203	83.3773	0.0108962	-0.0827917	0.068935		83.3925	0.0104122	-0.0827155	0.0700279			203	83.107	83.3903			203	83.107	83.3778
204	91.923	0.0172748	0.00481589	0.0398716		204	83.2836	-0.0103419	-0.0246998	0.0381453		83.3621	-0.0103186	-0.0328809	0.0330398			204	82.9106	83.352			204	82.9106	83.1884
205	91.876	-0.0265935	-0.0809981	-0.162733		205	83.1778	0.00685775	0.0738279	-0.00672396		83.2596	0.00687918	0.0738648	-0.00767825			205	82.7584	83.3326			205	82.7584	83.0487
206	91.8133	0.0290354	-0.206747	-0.359376		206	83.1347	-0.00356435	0.0259879	-0.0262228		83.1758	-0.00277958	0.0286537	-0.0162105			206	82.6631	83.1854			206	82.6631	82.9705
207	91.7613	-0.0278302	-0.0629929	-0.6633		207	83.1085	-0.00103351	-0.0529259	-0.040362		83.2058	-0.000855909	-0.0537505	-0.036823			207	82.6262	83.1144			207	82.6262	82.9583
208	91.701	0.0174716	0.183974	-0.999192		208	83.0666	0.00428519	-0.0384639	-0.0700825		83.1678	0.00567053	-0.0496184	-0.0704514			208	82.6394	83.0534			208	82.6394	83.0069
209	91.6693	-0.00820101	0.0681781	-0.812709		209	83.0327	-0.00645105	-0.014331	-0.101235		83.1485	-0.00622428	-0.0145004	-0.0977151			209	82.6868	83.03			209	82.6868	83.1001
210	91.647	-0.00354603	-0.125067	-0.430298		210	82.9605	0.00727979	0.0158631	-0.0595091		83.1021	0.00854027	0.0215074	-0.101914			210	82.7498	83.0303			210	82.7498	83.2127
211	91.615	0.011761	-0.0875347	-0.104354		211	82.8739	-0.00567613	0.0630558	0.0109049		82.9928	-0.00601802	0.06323	0.00711162			211	82.8108	83.0571			211	82.8108	83.3173
212	91.5863	-0.0153807	-0.0265134	0.344691		212	82.7971	0.00382205	0.0313696	0.0765708		82.8957	0.00441778	0.0319316	0.0771124			212	82.8578	83.0091			212	82.8578	83.3925
213	91.6707	0.0167796	0.0373226	0.387937		213	82.7137	-0.000222696	-0.0252716	0.161377		82.8102	-0.000832804	-0.022908	0.162538			213	82.8865	82.949			213	82.8865	83.4301
214	91.8037	-0.0131158	0.1378	0.310225		214	82.7419	-0.00241009	-0.0205622	0.10565		82.7124	-0.00268233	-0.0184621	0.151678			214	82.9006	82.8429			214	82.9006	83.4362
215	91.9352	0.00956515	0.0516483	0.376992		215	82.8155	0.00467249	-0.00979507	-0.00140782		82.8884	0.00466756	-0.00951196	0.00627952			215	82.9108	82.8899			215	82.9108	83.4284
216	92.1007	-0.00488564	-0.0964452	0.405581		216	82.8775	-0.00566144	0.0044245	-0.0826302		83.0234	-0.00613271	-0.00400141	-0.0762092			216	82.9316	82.937			216	82.9316	83.4282
217	92.239	0.00120397	-0.0434627	0.293656		217	82.9677	0.00464625	0.0294482	-0.191795		83.1053	0.0054993	0.0293548	-0.1787			217	82.9771	82.9614			217	82.9771	83.4553
218	92.3816	0.00128864	0.0462884	0.119351		218	83.0276	-0.00313064	0.00463315	-0.198138		83.2187	-0.00328772	0.00609649	-0.204646			218	83.0573	83.0168			218	83.0573	83.5221
219	92.5606	-0.00291114	0.0299642	-0.0872672		219	83.0865	-0.000143377	-0.0359596	-0.17109		83.2342	0.00107226	-0.0366775	-0.156142			219	83.1757	83.0424			219	83.1757	83.6319
220	92.7542	0.00373881	0.00702748	-0.351746		220	83.1759	0.00284668	-0.0319245	-0.177195		83.2704	0.00307927	-0.0247998	-0.150997			220	83.3274	83.0976			220	83.3274	83.7782
221	92.9127	-0.00364169	-0.0101381	-0.288093		221	83.2744	-0.00573583	-0.0215714	-0.170871		83.3742	-0.00459234	-0.0214991	-0.136189			221	83.5001	83.2119			221	83.5001	83.9456
222	93.067	0.00261399	-0.039179	-0.115356		222	83.3181	0.00749807	0.0122473	-0.0586084		83.4627	0.00757792	0.0113313	-0.0715476			222	83.6758	83.4101			222	83.6758	84.1121
223	93.2382	-0.000952468	-0.031464	-0.0169195		223	83.346	-0.00811092	0.0637367	0.101045		83.4445	-0.00710455	0.0640796	0.109737			223	83.8335	83.6112			223	83.8335	84.2534
224	93.4109	-0.00289826	-0.0130633	0.135766		224	83.3861	0.0077213	0.0160458	0.268733		83.4762	0.00742198	0.0366754	0.271196			224	83.9523	83.7914			224	83.9523	84.3472
225	93.6169	0.00582107	0.012503	0.112886		225	83.4182	-0.00574431	-0.0630807	0.473265		83.4916	-0.00529554	-0.0637529	0.481367			225	84.0151	83.9039			225	84.0151	84.3776
226	93.8395	-0.0100392	0.0500178	0.0328561		226	83.4815	0.00339326	-0.0196971	0.409741		83.5323	0.00298002	-0.021478	0.371524			226	84.0104	83.8853			226	84.0104	84.3377
227	94.0623	0.0116955	-0.00114706	0.0159631		227	83.5556	0.000390973	0.0505808	0.250277		83.6236	0.000138126	0.0512951	0.237428			227	83.9354	83.9125			227	83.9354	84.2304
228	94.2966	-0.0107208	-0.0836869	-0.0194369		228	83.6202	-0.00354062	0.0433613	0.140574		83.7014	-0.00359549	0.0482659	0.142612			228	83.7961	83.8887			228	83.7961	84.0666
229	94.3542	0.00782577	-0.015919	-0.0197817		229	83.6891	0.00727233	0.0287424	-0.0212983		83.7719	0.00655614	0.0289728	0.00281703			229	83.6078	83.8102			229	83.6078	83.8639
230	94.3419	0.000190954	0.0917116	-0.00719773		230	83.6371	-0.00941958	-0.0162106	-0.100215		83.8532	-0.00928153	-0.0193047	-0.0878938			230	83.393	83.7367			230	83.393	83.6437
231	94.349	-0.00714918	0.0879088	-0.0147813		231	83.5347	0.010247	-0.0857443	-0.163013		83.6444	0.00971639	-0.0865329	-0.155723			231	83.1784	83.4119			231	83.1784	83.4299
232	94.3131	0.0163465	0.0712877	-0.0211754		232	83.442	-0.00959043	-0.0299149	-0.282997		83.477	-0.00966096	-0.0453525	-0.286231			232	82.9901	83.1358			232	82.9901	83.2461
233	94.3308	-0.0220258	-0.0322726	0.028901		233	83.3169	0.0058415	0.0645253	-0.410975		83.3533	0.00639643	0.0644525	-0.41784			233	82.8482	83.0063			233	82.8482	83.1125
234	94.3531	0.0242808	-0.190632	0.101427		234	83.2222	-0.00224514	0.0260498	-0.324182		83.2034	-0.00168873	0.0274677	-0.335517			234	82.7624	82.8937			234	82.7624	83.0425
235	94.3287	-0.0234633	-0.0500614	0.17259		235	83.1265	-0.00361547	-0.0376129	-0.155805		83.1572	-0.00238626	-0.0382985	-0.163584			235	82.7295	82.953			235	82.7295	83.0378
236	94.2922	0.0167778	0.182817	0.259672		236	82.996	0.00742847	-0.0387547	-0.00541965		83.093	0.00863354	-0.0325823	-0.00731832			236	82.7334	83.0617			236	82.7334	83.0851
237	94.3406	-0.0096145	0.0602326	0.142405		237	82.8534	-0.0097639	-0.0391715	0.198284		82.9585	-0.00964411	-0.0395292	0.181693			237	82.7495	83.091			237	82.7495	83.1561
238	94.4146	-0.00087022	-0.13869	-0.0544967		238	82.7654	0.0100681	0.0124323	0.1896		82.8394	0.0110413	0.0155548	0.206249			238	82.7509	83.0723			238	82.7509	83.2146
239	94.472	0.00949331	-0.107298	-0.226119		239	82.6914	-0.00596157	0.0931308	0.113625		82.8186	-0.00753707	0.0937793	0.118352			239	82.716	83.0232			239	82.716	83.2269
240	94.5434	-0.0175202	-0.0513202	-0.445941		240	82.6022	0.00212351	0.058109	0.101858		82.7364	0.00274835	0.0565364	0.108772			240	82.6347	82.9045			240	82.6347	83.1748
241	94.5687	0.0227336	0.043176	-0.419848		241	82.5189	0.00436182	-0.00700897	0.0633879		82.6692	0.00322033	-0.00480363	0.0701456			241	82.5119	82.7378			241	82.5119	83.0629
242	94.5792	-0.0252129	0.189971	-0.30903		242	82.4005	-0.00840908	-0.031449	0.0213643		82.5798	-0.00903489	-0.0274968	0.0618968			242	82.3661	82.6052			242	82.3661	82.9168
243	94.606	0.024992	0.0357945	-0.258508		243	82.2683	0.0100732	-0.0649378	-0.0278858		82.4291	0.0103269	-0.0648831	-0.0168311			243	82.2239	82.3577			243	82.2239	82.7741
244	94.6279	-0.0211379	-0.217857	-0.1679		244	82.1435	-0.00979712	-0.0260646	-0.104114		82.2856	-0.0107689	-0.0165319	-0.101776			244	82.1123	82.1565			244	82.1123	82.6705
245	94.6408	0.0157471	-0.0576986	-0.00867197		245	82.0118	0.00465884	0.0436653	-0.195584		82.156	0.0066206	0.0435524	-0.200856			245	82.0507	82.0053			245	82.0507	82.6301
246	94.6492	-0.00625723	0.20005	0.192153		246	81.9669	-0.000202032	0.0223092	-0.124522		82.0159	-3.70003e-05	0.0214336	-0.129705			246	82.0445	81.9076			246	82.0445	82.6598
247	94.6531	-0.00225989	0.128369	0.431038		247	81.9564	-0.00605535	-0.0156816	0.00569754		82.0924	-0.00473879	-0.0162831	0.0118662			247	82.0838	82.0833			247	82.0838	82.7483
248	94.652	0.0131228	0.00606567	0.712876		248	81.935	0.00990193	-0.0298289	0.112917		82.1373	0.0105137	-0.0246211	0.11177			248	82.1457	82.235			248	82.1457	82.868
249	94.6534	-0.0203671	-0.0615092	0.591223		249	81.9343	-0.0107466	-0.051271	0.255283		82.1325	-0.0108623	-0.0512465	0.259594			249	82.201	82.3299			249	82.201	82.9807
250	94.6531	0.0250125	-0.164402	0.322045		250	81.9082	0.0100659	0.00484869	0.237726		82.1508	0.0104172	0.00562714	0.211131			250	82.2217	82.378			250	82.2217	83.0475
251	94.6475	-0.0258567	-0.0356697	0.11503		251	81.8798	-0.00543116	0.0930771	0.166157		82.0813	-0.00584607	0.0943767	0.147447			251	82.188	82.3173			251	82.188	83.0401
252	94.6391	0.0197932	0.180864	-0.177392		252	81.8739	0.00131174	0.051804	0.137682		82.0226	0.00132626	0.075702	0.138171			252	82.092	82.2378			252	82.092	82.9499
253	94.6225	-0.013088	0.0513119	-0.236018		253	81.8737	0.00360474	-0.021312	0.0852985		82.0249	0.00356727	-0.0196979	0.0817882			253	81.9391	82.0906			253	81.9391	82.7894
254	94.6006	0.00108221	-0.159827	-0.228605		254	81.8279	-0.00712823	-0.0312132	0.000468227		82.0174	-0.00772338	-0.0272586	0.0126562			254	81.7451	81.9951			254	81.7451	82.5867
255	94.5761	0.00784055	-0.106764	-0.319189		255	81.7677	0.00874675	-0.0428515	-0.104809		81.9284	0.00842431	-0.0421538	-0.100876			255	81.5321	81.7937			255	81.5321	82.3743
256	94.5472	-0.0151674	-0.0161629	-0.395768		256	81.7157	-0.00946578	0.00223336	-0.233094		81.8769	-0.00920863	-0.00238674	-0.229321			256	81.3247	81.636			256	81.3247	82.181
257	94.5159	0.0188637	0.0499719	-0.315621		257	81.6555	0.00866531	0.0773335	-0.384185		81.8074	0.00777556	0.0773694	-0.387783			257	81.1462	81.5048			257	81.1462	82.0288
258	94.4814	-0.0159248	0.151263	-0.172601		258	81.6187	-0.00739101	0.0150318	-0.332429		81.7531	-0.00656161	0.0161046	-0.301394			258	81.0169	81.4613			258	81.0169	81.9356
259	94.4423	0.0122736	0.0644494	-0.0226189		259	81.5888	0.00582482	-0.085662	-0.207486		81.7462	0.00448265	-0.0868338	-0.210805			259	80.953	81.4531			259	80.953	81.917
260	94.3995	-0.00415037	-0.0885185	0.176384		260	81.5496	-0.00369835	-0.0383091	-0.11508		81.7316	-0.00279318	-0.0692088	-0.113389			260	80.9661	81.5462			260	80.9661	81.9857
261	94.3901	-0.00183442	-0.0516731	0.184454		261	81.5122	0.000749471	0.0394969	0.0192567		81.703	0.00112228	0.0394643	-0.00573698			261	81.0612	81.7378			261	81.0612	82.1484
262	94.3926	0.00603798	0.0150183	0.134992		262	81.5286	0.00226583	0.0255747	0.08626		81.6777	0.00303235	0.0273371	0.0799632			262	81.2358	81.7881			262	81.2358	82.3997
263	94.3898	-0.0083267	0.0138374	0.144563		263	81.5678	-0.00697364	0.00256973	0.140817		81.7518	-0.00474114	0.00176755	0.141766			263	81.4771	81.8906			263	81.4771	82.7192
264	94.3939	0.00605158	0.0178623	0.132074		264	81.6065	0.0102783	-0.0345457	0.241425		81.8016	0.0102577	-0.00255919	0.241263			264	81.762	82.0506			264	81.762	83.071
265	94.385	-0.00414029	-0.00131934	0.131553		265	81.6612	-0.0136188	-0.0916344	0.348665		81.8639	-0.0120636	-0.0924093	0.348196			265	82.058	82.1076			265	82.058	83.4073
266	94.3732	0.000874489	-0.0351228	0.132038		266	81.7018	0.0146596	0.000602377	0.295401		81.9255	0.0133774	-0.00324809	0.256572			266	82.3278	82.1922			266	82.3278	83.6765
267	94.3691	0.00100234	-0.010339	0.109641		267	81.7438	-0.0124829	0.145523	0.181828		81.9472	-0.012991	0.145502	0.172987			267	82.535	82.2527			267	82.535	83.835
268	94.3655	-0.000147229	0.0300642	0.0792461		268	81.8031	0.00920005	0.0664054	0.0824065		81.9841	0.00787516	0.0877166	0.0758923			268	82.6519	82.1556			268	82.6519	83.8581
269	94.3444	-0.000698836	0.0113798	0.00799516		269	81.869	-0.00202195	-0.067539	-0.0562513		82.0448	-0.00268273	-0.0653058	-0.0359441			269	82.6651	81.9408			269	82.6651	83.7473
270	94.3168	0.00372436	-0.0189229	-0.0868107		270	81.9195	-0.00386607	-0.0458542	-0.104436		82.1088	-0.00454056	-0.056456	-0.122849			270	82.5788	81.9249			270	82.5788	83.5299
271	94.2907	-0.00516264	0.000162819	-0.188316		271	81.9684	0.0102565	-0.00736539	-0.131012		82.1447	0.0101656	-0.00645632	-0.128533			271	82.4141	82.0199			271	82.4141	83.2508
272	94.2602	0.00478213	0.0285619	-0.308036		272	82.0249	-0.0141799	0.0297444	-0.201993		82.201	-0.0144472	0.0144779	-0.211184			272	82.2051	81.9898			272	82.2051	82.959
273	94.2368	-0.00345385	0.0036559	-0.273903		273	82.0821	0.0148189	0.0906215	-0.272161		82.2489	0.0145074	0.0904893	-0.26005			273	81.9913	82.0939			273	81.9913	82.6971
274	94.2145	-0.00136131	-0.0343371	-0.183551		274	82.1545	-0.0139561	0.00314727	-0.232287		82.3113	-0.0140199	0.00413601	-0.216726			274	81.8106	82.0847			274	81.8106	82.4959
275	94.1876	0.00495062	-0.0385113	-0.118741		275	82.2345	0.0096402	-0.136458	-0.14991		82.3954	0.00889162	-0.138269	-0.151705			275	81.6932	82.1143			275	81.6932	82.3766
276	94.1599	-0.00890415	-0.0400728	-0.0221625		276	82.3148	-0.00544617	-0.0607949	-0.0717909		82.4788	-0.00451237	-0.0652554	-0.0699688			276	81.6571	82.3391			276	81.6571	82.353
277	94.1077	0.0107223	0.0138278	0.0476856		277	82.4003	0.000406395	0.0663267	0.0360866		82.5646	-0.000600445	0.0643258	0.0106268			277	81.7078	82.639			277	81.7078	82.4315
278	94.0444	-0.00895032	0.0961329	0.118343		278	82.4306	0.00378028	0.0424803	0.0791391		82.6555	0.00535885	0.0451492	0.108065			278	81.8388	82.8141			278	81.8388	82.6077
279	93.9814	0.00662553	0.0459902	0.222834		279	82.4398	-0.00719254	0.00130619	0.108103		82.6099	-0.00637828	0.00168557	0.105821			279	82.0342	82.711			279	82.0342	82.8618
280	93.9106	-0.00100676	-0.0413251	0.339272		280	82.4569	0.00960167	-0.0301726	0.170632		82.5876	0.0105838	-0.00471196	0.174606			280	82.2711	82.7681			280	82.2711	83.1591
281	93.8436	-0.00301641	-0.0320126	0.264125		281	82.4616	-0.0115054	-0.0816321	0.233978		82.5847	-0.00957045	-0.0825869	0.223975			281	82.5216	82.7165			281	82.5216	83.4552
282	93.7746	0.00608566	-0.0130298	0.11664		282	82.4848	0.0119457	-0.00192604	0.219015		82.5753	0.0112536	-0.00390118	0.211892			282	82.7551	82.7945			282	82.7551	83.7049
283	93.6975	-0.0074945	-0.00120762	-0.00994978		283	82.5109	-0.0114197	0.125254	0.174669		82.6202	-0.010923	0.125267	0.164023			283	82.9413	82.8985			283	82.9413	83.8709
284	93.6164	0.00501605	0.0223312	-0.181834		284	82.5235	0.00932883	0.0521462	0.13481		82.6576	0.00786056	0.0693829	0.110828			284	83.0536	82.8456			284	83.0536	83.9292
285	93.5444	-0.0029361	0.0047221	-0.165857		285	82.5336	-0.00422648	-0.0700476	0.0747994		82.6654	-0.00548412	-0.0674445	0.0674986			285	83.0747	82.66			285	83.0747	83.873
286	93.4735	-0.0009677	-0.025663	-0.0889589		286	82.5729	-0.000756842	-0.0365856	-0.0089634		82.6812	-0.000986685	-0.0463746	0.00763698			286	83.0011	82.6415			286	83.0011	83.7135
287	93.398	0.00297674	-0.0109984	-0.0668818		287	82.6221	0.00894268	0.0188969	-0.111801		82.7496	0.00721435	0.0202588	-0.113775			287	82.847	82.6633			287	82.847	83.4788
288	93.3221	-0.00227895	0.0124906	-0.0196899		288	82.6674	-0.0142283	0.054643	-0.23444		82.7947	-0.0140309	0.00517084	-0.244944			288	82.6443	82.5409			288	82.6443	83.2107
289	93.2377	0.000873319	0.00904573	0.0044722		289	82.7188	0.0183562	0.108793	-0.376957		82.8518	0.0166543	0.108705	-0.361488			289	82.4383	82.6156			289	82.4383	82.9577
290	93.1491	0.00441664	0.00304602	0.0247994		290	82.7567	-0.0188137	-0.00970071	-0.324903		82.8986	-0.019849	-0.0114426	-0.334285			290	82.2785	82.533			290	82.2785	82.7684
291	93.0603	-0.00774923	0.0296078	0.0716819		291	82.7913	0.0127771	-0.195119	-0.20147		82.9208	0.0133392	-0.197549	-0.211365			291	82.2075	82.5252			291	82.2075	82.6838
292	92.9686	0.0108205	0.0659751	0.125628		292	82.8327	-0.0061544	-0.12478	-0.107163		82.9508	-0.00674011	-0.0898428	-0.106828			292	82.249	82.7473			292	82.249	82.7308
293	92.8617	-0.011097	-0.00417328	0.0778395		293	82.8741	-0.00644119	0.00474066	0.0288041		82.987	-0.00348312	0.00712699	0.0108431			293	82.4002	83.0015			293	82.4002	82.9135
294	92.7469	0.00630673	-0.111601	-0.00711477		294	82.8997	0.0132585	0.0687932	0.0873206		83.021	0.0158315	0.0635365	0.0916478			294	82.6299	83.192			294	82.6299	83.2034
295	92.6298	-0.00117841	-0.0812228	-0.0801597		295	82.9193	-0.0271825	0.159804	0.12932		83.0283	-0.0176817	0.160295	0.133723			295	82.8842	83.3047			295	82.8842	83.5358
296	92.5063	-0.00848701	-0.0209574	-0.176326		296	82.9396	0.0347211	0.0820675	0.217552		83.046	0.0281775	0.0512584	0.222297			296	83.099	83.3478			296	83.099	83.8206
297	92.3837	0.0150691	0.0375981	-0.149408		297	82.9558	0.0126082	-0.0617703	0.309515		83.0565	-0.0320156	-0.0658969	0.309903			297	83.2154	83.2685			297	83.2154	83.9693
298	92.2582	-0.0202573	0.124024	-0.0796913		298	82.9777	-0.0418856	-0.0600701	0.228298		83.0721	-0.0207991	-0.0702574	0.2294			298	83.1946	83.2105			298	83.1946	83.9261
299	92.1262	0.0216056	0.0240283	-0.0391219														297	83.2154	83.2685
300	91.9901	-0.01643	-0.14241	0.0221348														298	83.1946	83.2105
301	91.855	0.0102168	-0.0389824	0.0431362
302	91.7177	0.00145092	0.128396	0.053617
303	91.5761	-0.0104983	0.106333	0.0870166
304	91.4317	0.0190232	0.0622063	0.120975
305	91.2814	-0.0236638	-0.0422222	0.109717
306	91.1267	0.0228483	-0.202708	0.0819085
307	90.9694	-0.0199198	-0.069918	0.0568102
308	90.8083	0.0115841	0.155006	0.0203215
309	90.7627	-0.00401338	0.0646487	-0.0145674
310	90.7642	-0.00517026	-0.0856292	-0.0538263
311	90.7568	0.0117752	-0.0761436	-0.104924
312	90.7798	-0.0160868	-0.0601437	-0.162937
313	90.7706	0.017895	0.0259277	-0.138719
314	90.7609	-0.0156442	0.161784	-0.0840073
315	90.7841	0.0124853	0.0638084	-0.0400937
316	90.8177	-0.0060127	-0.102913	0.0222227
317	90.8024	0.000716804	-0.0507155	0.0461827
318	90.7745	0.00504693	0.0376558	0.0613024
319	90.7598	-0.00854058	0.0336129	0.09704
320	90.7396	0.00908806	0.0303806	0.133346
321	90.751	-0.00836094	-0.0102576	0.10739
322	90.7746	0.00367507	-0.0762177	0.0573904
323	90.7913	-5.56332e-05	-0.0469054	0.010828
324	90.8142	-0.00441281	0.00711809	-0.0521318
325	90.7243	0.00664456	0.0263891	-0.0587443
326	90.5884	-0.00529209	0.0525413	-0.0487012
327	90.4637	0.00332021	0.0384713	-0.0580343
328	90.3103	0.002631	0.00683149	-0.0618403
329	90.1881	-0.00649387	-0.0201684	-0.0774329
330	90.0667	0.00945808	-0.0576867	-0.0975023
331	89.9144	-0.0100001	-0.0239158	-0.111496
332	89.7527	0.00515056	0.0357507	-0.126251
333	89.645	-0.000787419	0.0177212	-0.0508582
334	89.5526	-0.00693804	-0.0136839	0.0631784
335	89.4478	0.0113604	-0.0305194	0.172589
336	89.3507	-0.0122961	-0.0556508	0.307686
337	89.2223	0.0108915	0.00656132	0.293466
338	89.0828	-0.00266136	0.103593	0.227258
339	88.9524	-0.00390976	0.0827646	0.194042
340	88.8175	0.0124976	0.0373526	0.134691
341	88.7332	-0.0169783	-0.0362689	0.0112886
342	88.6693	0.0158639	-0.145894	-0.148121
343	88.5986	-0.0126592	-0.071953	-0.331561
344	88.5398	0.00240187	0.0602354	-0.548882
345	88.4672	0.00572749	0.0490709	-0.476023
346	88.3935	-0.014676	0.0236435	-0.298116
347	88.3329	0.0196381	-0.0287196	-0.167983
348	88.2757	-0.0188548	-0.114407	0.0217757
349	88.1901	0.0160979	-0.00780298	0.119854
350	88.0953	-0.00751425	0.162152	0.201806
351	88.0055	0.000178174	0.0941803	0.349055
352	87.9106	0.00790379	-0.0249797	0.506821
353	87.8299	-0.0133964	-0.0531107	0.444829
354	87.7534	0.0155688	-0.0916906	0.301174
355	87.6709	-0.0159924	-0.0126618	0.1784
356	87.5894	0.0130441	0.121152	0.00297369
357	87.6629	-0.00975679	0.0300069	-0.100791
358	87.8022	0.00500378	-0.118731	-0.196527
359	87.9357	-0.000870647	-0.061982	-0.349691
360	88.1139	-0.00331847	0.0313913	-0.515941
361	88.2537	0.0063452	0.0359289	-0.422508
362	88.3975	-0.00843711	0.0415887	-0.230795
363	88.5893	0.00934231	0.00214499	-0.0642796
364	88.7993	-0.00827838	-0.065371	0.165067
365	88.9537	0.00689056	-0.012283	0.192246
366	89.098	-0.00364172	0.0741906	0.160179
367	89.264	0.00133314	0.0339847	0.201669
368	89.4286	0.000717038	-0.0317074	0.225287
369	89.6383	-0.00156175	-0.0221137	0.130572
370	89.8688	-9.99657e-05	-0.00584328	-0.0150786
371	90.0961	0.00161845	-0.0208155	-0.173544
372	90.3366	-0.00508339	-0.0379806	-0.373861
373	90.3484	0.00679195	0.00445527	-0.252848
374	90.2687	-0.0070992	0.0679153	-0.016078
375	90.2124	0.00580426	0.0363229	0.163411
376	90.0991	-0.00064382	-0.0195507	0.406798
377	90.0526	-0.00392777	-0.0218982	0.370816
378	90.0104	0.0107033	-0.0229139	0.239841
379	89.9063	-0.0147541	0.0287331	0.186601
380	89.7849	0.0164459	0.10908	0.0923394
381	89.7717	-0.0156335	0.00473514	-0.0181533
382	89.7898	0.00965215	-0.15917	-0.146544
383	89.7849	-0.00374429	-0.0914141	-0.316081
384	89.7963	-0.00536646	0.0274448	-0.513232
385	89.7466	0.0117975	0.0506312	-0.415237
386	89.6762	-0.0165235	0.0815871	-0.208956
387	89.6252	0.0182088	0.00638025	-0.0443128
388	89.5662	-0.0148949	-0.120488	0.184611
389	89.5877	0.0105527	-0.026714	0.199514
390	89.6418	-0.00213308	0.125492	0.149064
391	89.6844	-0.00471674	0.0884895	0.174053
392	89.7459	0.0118391	0.0217244	0.177853
393	89.7861	-0.0160917	-0.0391642	0.127845
394	89.825	0.0171237	-0.131535	0.0530008
395	89.8843	-0.0159277	-0.0391877	-0.0408578
396	89.9493	0.0104324	0.117625	-0.160143
397	89.9668	-0.00471684	0.0427679	-0.129666
398	89.969	-0.00378861	-0.0808955	-0.0493932
399	89.9793	0.0103163	-0.07945	-0.00205011
400	89.9809	-0.0164664	-0.0721736	0.0704745
401	90.0055	0.0195627	0.0255604	0.0670172
402	90.0368	-0.0190129	0.177764	0.0395432
403	90.0581	0.0163584	0.0656696	0.0411508
404	90.0807	-0.00882979	-0.123779	0.0358323
405	90.0117	0.00180963	-0.0561605	0.0114772
406	89.9034	0.00775199	0.0566045	-0.021144
407	89.8003	-0.0144091	0.0703503	-0.059883
408	89.6712	0.0189056	0.0903406	-0.107115
409	89.5626	-0.0203727	-0.0182184	-0.0872393
410	89.451	0.0164984	-0.189034	-0.0434379
411	89.3117	-0.0119009	-0.0827925	-0.0113696
412	89.1614	0.00335917	0.0985492	0.0340243
413	89.05	0.00330363	0.0602707	0.0377779
414	88.947	-0.00926271	-0.00692508	0.0288158
415	88.8307	0.0127548	-0.027443	0.0353501
416	88.7169	-0.0122486	-0.0649061	0.0381101
417	88.5749	0.0108056	-0.000353486	0.0289759
418	88.4207	-0.00627656	0.104608	0.0146531
419	88.2702	0.0025104	0.0486881	-0.00294082
420	88.1124	0.00107706	-0.0459485	-0.0256175
421	88.1187	-0.0036311	-0.0334683	-0.0221526
422	88.1919	0.00427156	-0.0105889	-0.0102926
423	88.2505	-0.00464808	0.00473082	-0.00484726
424	88.3517	0.00412272	0.0330497	0.00457076
425	88.4075	-0.00371984	0.0056791	0.0166203
426	88.4623	0.0039063	-0.0400961	0.030972
427	88.563	-0.00375024	-0.00686311	0.0492717
428	88.678	0.00389845	0.0454661	0.0706087
429	88.7188	-0.00330333	0.0112922	0.0387886
430	88.7395	0.00154047	-0.0423738	-0.0138083
431	88.7786	0.000398847	-0.032186	-0.0609377
432	88.8083	-0.00388485	-0.0131226	-0.121106
433	88.8832	0.00636422	0.0135193	-0.108214
434	88.9749	-0.00874985	0.0543065	-0.0697665
435	89.055	0.00957761	0.00724724	-0.0479228
436	89.1428	-0.00816999	-0.0697593	-0.0134321
437	89.1586	0.00605423	-0.0156089	0.0146151
438	89.1461	-0.00134254	0.0710126	0.044089
439	89.1446	-0.00241806	0.0500178	0.0868007
440	89.1269	0.00664387	0.0123372	0.135131
441	89.1304	-0.00896964	-0.0229377	0.0952819
442	89.1366	0.00885271	-0.0764036	0.021947
443	89.1252	-0.00764725	-0.0330614	-0.0416642
444	89.1098	0.00313105	0.0432026	-0.126167
445	89.1366	0.000501832	0.0247988	-0.0974718
446	89.1776	-0.00502024	-0.00820723	-0.0293715
447	89.2126	0.0074769	-0.0160684	0.012299
448	89.256	-0.00715773	-0.0300976	0.0731759
449	89.2801	0.00581628	0.00320174	0.0585673
450	89.2994	-0.000682315	0.0564113	0.0180416
451	89.3283	-0.00306839	0.0457336	0.000442376
452	89.357	0.00735549	0.0222138	-0.0275399
453	89.3481	-0.0090951	-0.0201951	-0.019398
454	89.3242	0.00688992	-0.0834242	0.00167686
455	89.3017	-0.00386782	-0.0576274	0.0106281
456	89.2688	-0.00374555	-0.00570722	0.0243064
457	89.2478	0.00895988	0.0275587	0.076768
458	89.2269	-0.0140569	0.074556	0.146663
459	89.1949	0.0154602	0.0162077	0.219683
460	89.1594	-0.0110256	-0.0825054	0.306309
461	89.1355	0.0054409	-0.0226038	0.156069
462	89.1137	0.00647954	0.0747173	-0.0882501
463	89.0878	-0.0150951	0.0970492	-0.308247
464	89.0624	0.0237391	0.121804	-0.587063
465	89.0275	-0.0270302	-0.026694	-0.567521
466	88.9885	0.0226854	-0.255716	-0.446016
467	88.9503	-0.0158648	-0.131489	-0.398069
468	88.9095	0.000132563	0.0869644	-0.302047
469	88.8351	0.0124339	0.0832634	-0.052579
470	88.7452	-0.0265813	0.0665975	0.27692
471	88.6542	0.0343391	-0.0446216	0.648984
472	88.5518	-0.0341243	-0.225672	1.09291
473	88.4554	0.0298901	-0.0196997	0.941316
474	88.356	-0.015139	0.308214	0.574511
475	88.2447	0.00214273	0.180866	0.308112
476	88.1276	0.0143185	-0.0420696	-0.0794753
477	88.0187	-0.0252741	-0.100004	-0.256035
478	87.9094	0.0301004	-0.180732	-0.388962
479	87.7935	-0.0307839	-0.0385317	-0.655639
480	87.6756	0.0224373	0.205314	-0.936433
481	87.5466	-0.0142708	0.060148	-0.762151
482	87.4111	0.00246993	-0.179303	-0.415014
483	87.274	0.00636171	-0.105415	-0.103175
484	87.1319	-0.01203	0.0164239	0.322836
485	87.0765	0.0152916	0.053557	0.370085
486	87.0555	-0.013875	0.110298	0.305936
487	87.0256	0.0119444	0.0300406	0.376024
488	87.0173	-0.00835795	-0.10829	0.41092
489	86.9828	0.00505666	-0.0373305	0.346747
490	86.9464	-0.00229347	0.0809602	0.238142
491	86.9332	-0.000313782	0.0455954	0.0984462
492	86.9264	0.00308015	-0.0108077	-0.0857904
493	86.8793	-0.0052268	-0.0219913	-0.144708
494	86.8205	0.00800405	-0.0400635	-0.174467
495	86.7702	-0.00921496	0.00190395	-0.255984
496	86.7136	0.00897131	0.0709783	-0.332589
497	86.6797	-0.00747159	0.0120593	-0.296123
498	86.6534	0.00258321	-0.0822602	-0.214724
499	86.6198	0.00157499	-0.0576758	-0.133527
500	86.5891	-0.0072099	-0.0126405	-0.0193881
501	86.537	0.0105734	0.0271629	0.0630566
502	86.4764	-0.0111597	0.0869144	0.147431
503	86.4196	0.0103347	0.031523	0.267272
504	86.3581	-0.00546396	-0.0640675	0.399753
505	86.3024	0.00139705	-0.0292481	0.335115
506	86.2473	0.0032996	0.03003	0.196283
507	86.1872	-0.00636449	0.0245428	0.079315
508	86.1259	0.00652948	0.0167688	-0.0839908
509	86.0789	-0.00631069	-0.00870292	-0.128427
510	86.0369	0.00403304	-0.0496345	-0.141684
511	85.993	-0.00251738	-0.0126013	-0.20786
512	85.9521	0.00227837	0.048487	-0.269354
513	85.9051	-0.00209539	0.0161421	-0.230381
514	85.8567	0.00373057	-0.0364302	-0.15207
515	85.8116	-0.00412712	-0.0112032	-0.0736649
516	85.7668	0.00322849	0.0277547	0.0338529
517	85.7969	-0.00158707	0.00853386	0.0796017
518	85.8594	-0.00326002	-0.0207693	0.11272
519	85.9189	0.00668962	-0.0371539	0.17864
520	86.0001	-0.0105255	-0.0589268	0.246057
521	86.0643	0.0118723	0.00919019	0.230939
522	86.1311	-0.00921559	0.114398	0.184879
523	86.2213	0.00584001	0.0642182	0.144187
524	86.3207	0.00177382	-0.025179	0.0825404
525	86.3914	-0.00719884	-0.0365836	-0.0100584
526	86.4566	0.0120685	-0.0496342	-0.125079
527	86.5329	-0.0139267	-0.0040653	-0.260414
528	86.6084	0.010673	0.0739333	-0.418178
529	86.7066	-0.00663828	0.0161374	-0.382027
530	86.8153	-0.00183903	-0.0780347	-0.276027
531	86.9222	0.00808082	-0.0704743	-0.201767
532	87.0357	-0.0137409	-0.0510526	-0.0877461
533	87.0581	0.0162473	0.0260814	0.0363079
534	87.0446	-0.0139359	0.144103	0.179902
535	87.0419	0.0103068	0.0678062	0.363971
536	87.0172	-0.00208663	-0.0659004	0.575481
537	87.0203	-0.00462509	-0.0472481	0.495006
538	87.026	0.0120071	-0.0112469	0.307437
539	87.0079	-0.0163503	0.0338863	0.161185
540	86.984	0.0172025	0.107168	-0.0485897
541	87.0052	-0.0158399	0.00337042	-0.140092
542	87.0404	0.00960766	-0.161617	-0.206661
543	87.0674	-0.00365359	-0.0903367	-0.34376
544	87.1021	-0.00488067	0.0340491	-0.48666
545	87.1131	0.010875	0.0518175	-0.393978
546	87.1168	-0.0151147	0.0741248	-0.211244
547	87.1295	0.0166071	0.00786297	-0.0452337
548	87.1402	-0.0133223	-0.105247	0.180806
549	87.1678	0.00936847	-0.0240636	0.197755
550	87.2028	-0.00162655	0.108459	0.152096
551	87.2348	-0.0042262	0.0720701	0.177459
552	87.2709	0.0095368	0.00844092	0.181564
553	87.3036	-0.0122664	-0.034799	0.128409
554	87.3364	0.0107556	-0.100014	0.0484493
555	87.3735	-0.00843221	-0.0461828	-0.0504845
556	87.4121	0.00237055	0.0501641	-0.176116
557	87.4388	0.00211218	0.0334155	-0.138384
558	87.4617	-0.00623531	0.00107419	-0.0456614
559	87.4867	0.00817438	-0.00836568	0.01223
560	87.5094	-0.00631284	-0.0273436	0.0983688
561	87.5378	0.0039589	-0.00145336	0.10015
562	87.5678	0.00156967	0.0414836	0.0755853
563	87.5952	-0.00540999	0.040621	0.0836221
564	87.623	0.00861509	0.0338612	0.0842522
565	87.6726	-0.00963352	-0.01451	0.0312264
566	87.7314	0.00693815	-0.0879882	-0.0446487
567	87.7895	-0.00367588	-0.0533189	-0.125618
568	87.854	-0.00280489	0.0111952	-0.225145
569	87.9126	0.00761874	0.0294068	-0.196176
570	87.9717	-0.0122304	0.0533542	-0.121769
571	88.0376	0.0142583	-0.0038625	-0.0721514
572	88.106	-0.0127907	-0.0978294	0.00181733
573	88.1671	0.00988622	-0.0169714	0.0450452
574	88.227	-0.0029872	0.112458	0.0839793
575	88.2899	-0.00303735	0.0807418	0.14925
576	88.3527	0.0104494	0.0217318	0.220459
577	88.4216	-0.0152548	-0.0366153	0.197341
578	88.4934	0.017762	-0.124534	0.139659
579	88.5648	-0.0177767	-0.0282345	0.0924008
580	88.6382	0.0134408	0.132662	0.0233926
581	88.7871	-0.00848483	0.039422	-0.0330273
582	88.969	0.000216691	-0.112175	-0.0931795
583	89.1496	0.00638861	-0.0835171	-0.176307
584	89.3531	-0.0128993	-0.0324182	-0.269626
585	89.5399	0.0167215	0.0359495	-0.240139
586	89.7302	-0.0171184	0.141268	-0.165607
587	89.9449	0.015816	0.0438111	-0.107104
588	90.1699	-0.010408	-0.120782	-0.0213072
589	90.3694	0.00544558	-0.0444934	0.0433624
590	90.5655	0.0010389	0.0813576	0.110135
591	90.7736	-0.00564701	0.0533442	0.205944
592	90.9824	0.00823523	0.00859438	0.312856
593	91.2143	-0.00937334	-0.0237491	0.25545
594	91.4578	0.00732544	-0.0749492	0.136405
595	91.7012	-0.00533712	-0.0294946	0.036169
596	91.9523	0.00219293	0.0495635	-0.102348
597	92.0084	7.73859e-05	0.0252131	-0.119181
598	91.9851	-0.0010077	-0.0171555	-0.100184
599	91.9782	0.00159703	-0.00774047	-0.125912
600	91.9206	-0.000827289	0.00431495	-0.140995
601	91.9175	0.000442656	0.00226719	-0.114964
602	91.9156	-0.000594675	0.00093922	-0.0711864
603	91.8588	0.000803224	-0.00820988	-0.0185174
604	91.785	-0.00224205	-0.0218429	0.0506045
605	91.7973	0.00280296	-0.000578817	0.0613891
606	91.8324	-0.00283927	0.0326045	0.0560029
607	91.8458	0.00199999	0.0225831	0.0702342
608	91.8697	0.00114711	0.003459	0.0790576
609	91.8402	-0.00376915	-0.0100362	0.0794837
610	91.7907	0.00771027	-0.029977	0.0758798
611	91.7541	-0.00973957	0.0099203	0.0671957
612	91.7081	0.00997049	0.0728541	0.0535723
613	91.7432	-0.0085766	0.00848312	0.0103748
614	91.8099	0.00354482	-0.0929243	-0.0482589
615	91.8633	0.00118151	-0.0666858	-0.110771
616	91.9344	-0.00798595	-0.0169702	-0.185298
617	91.9808	0.0125877	0.0306856	-0.166476
618	92.0235	-0.0157024	0.101983	-0.113976
619	92.0856	0.0163603	0.0183938	-0.0779688
620	92.1516	-0.0130638	-0.120238	-0.0233129
621	92.1687	0.008904	-0.031331	0.021912
622	92.1689	-0.00125194	0.112199	0.0701168
623	92.1754	-0.00495989	0.0820955	0.137902
624	92.1715	0.0116656	0.0278022	0.214416
625	92.1889	-0.0155602	-0.0358936	0.164374
626	92.2112	0.0163095	-0.133312	0.0666469
627	92.2218	-0.0150033	-0.0467221	-0.016432
628	92.232	0.00888468	0.101364	-0.129025
629	92.2538	-0.00332176	0.0416572	-0.112001
630	92.2791	-0.0047743	-0.0581622	-0.0521051
631	92.3034	0.00997096	-0.0528678	-0.0282334
632	92.3301	-0.0125718	-0.0436481	0.0141256
633	92.3501	0.0126626	0.0185665	0.0404868
634	92.3683	-0.0069112	0.1163	0.0648896
635	92.3892	0.00180783	0.0750761	0.108833
636	92.4098	0.00639254	-0.00301798	0.15848
637	92.428	-0.0112085	-0.0398258	0.0883582
638	92.4453	0.0124375	-0.0910583	-0.0279834
639	92.4623	-0.0112459	-0.0462951	-0.133102
640	92.4785	0.00321802	0.0369263	-0.267787
641	92.4959	0.00326793	0.0317194	-0.217682
642	92.5132	-0.0119657	0.0170734	-0.101615
643	92.5297	0.0166207	-0.0216264	-0.0240327
644	92.546	-0.0157171	-0.0843478	0.0876525
645	92.5191	0.0128707	-0.00330871	0.0956603
646	92.4736	-0.00277879	0.125096	0.0714596
647	92.4298	-0.00480507	0.0884037	0.0867253
648	92.3734	0.0127204	0.0188818	0.0927122
649	92.327	-0.0165974	-0.0435957	0.053192
650	92.2791	0.0133289	-0.135942	-0.00586062
651	92.2177	-0.00929321	-0.0738796	-0.0722426
652	92.151	-0.000771171	0.0406324	-0.155715
653	92.1005	0.00753679	0.0473285	-0.107061
654	92.0528	-0.0119205	0.049078	-0.0109714
655	91.9988	0.0131487	0.0192635	0.0616713
656	91.9452	-0.00676013	-0.0377161	0.160557
657	91.8785	0.00127745	-0.0182549	0.123772
658	91.8059	0.00740864	0.0176594	0.0390758
659	91.7341	-0.0123981	0.0295246	-0.0127917
660	91.6586	0.0123196	0.0469613	-0.0875088
661	91.6269	-0.0104636	-0.00757838	-0.0730952
662	91.6123	0.00192903	-0.0926795	-0.0279881
663	91.5918	0.00435331	-0.0677669	-0.0101163
664	91.5815	-0.0105522	-0.0179867	0.0199884
665	91.5572	0.013445	0.033134	0.04061
666	91.5311	-0.0100346	0.108128	0.0600452
667	91.516	0.00627637	0.060299	0.0923359
668	91.5033	0.00183609	-0.028461	0.128536
669	91.4677	-0.00731224	-0.0382825	0.0671857
670	91.4246	0.0102451	-0.0467025	-0.0324794
671	91.3851	-0.0110733	-0.0130777	-0.123789
672	91.3411	0.00653849	0.0474527	-0.239828
673	91.3083	-0.00268012	0.0173472	-0.200665
674	91.2785	-0.00249731	-0.0342632	-0.106169
675	91.2437	0.00578576	-0.0238576	-0.0438971
676	91.2093	-0.00574504	-0.0067392	0.0470282
677	91.2231	0.00527394	0.010671	0.0714984
678	91.2572	-0.00224581	0.037918	0.0777072
679	91.2896	0.000285121	0.0135711	0.116186
680	91.3358	0.000189069	-0.0280883	0.152801
681	91.3693	-0.00028502	-0.0134275	0.137843
682	91.4037	-0.00205269	0.0116212	0.103484
683	91.453	0.00319419	-0.00110239	0.0696761
684	91.5077	-0.00342229	-0.0190664	0.02155
685	91.5461	0.00266336	-0.000913959	-0.0235246
686	91.5816	0.00135383	0.0261505	-0.0739522
687	91.6236	-0.00433376	0.03437	-0.139329
688	91.6653	0.00813284	0.0425716	-0.213251
689	91.7205	-0.00971839	-0.00988269	-0.213021
690	91.782	0.00801256	-0.0901497	-0.186827
691	91.8426	-0.00540336	-0.0490345	-0.172796
692	91.9072	-0.000886177	0.0242723	-0.14392
693	91.8313	0.00576144	0.0299123	-0.0329636
694	91.6974	-0.0106381	0.0346988	0.118587
695	91.5737	0.0132316	-0.0123351	0.281867
696	91.4123	-0.0125673	-0.0889835	0.477853
697	91.2884	0.0106841	-0.0110657	0.418094
698	91.164	-0.0057251	0.113255	0.266085
699	90.999	0.00114971	0.063629	0.159052
700	90.8204	0.00427559	-0.0218982	0.000844994
701	90.7014	-0.00832166	-0.0359408	-0.0917373
702	90.5971	0.0114338	-0.05481	-0.175615
703	90.4759	-0.0128871	0.00445865	-0.314937
704	90.3607	0.0124093	0.102282	-0.466823
705	90.206	-0.0107234	0.0167514	-0.386502
706	90.0356	0.00647802	-0.120455	-0.219135
707	89.8729	-0.00239221	-0.0667633	-0.0752259
708	89.7019	-0.00352428	0.0245242	0.124081
709	89.5882	0.00766433	0.0373692	0.161799
710	89.4958	-0.0108026	0.0546691	0.154238
711	89.3925	0.0119015	0.00821201	0.210804
712	89.3006	-0.00927454	-0.0715921	0.256326
713	89.1893	0.00634069	-0.0175057	0.197576
714	89.074	-0.000477701	0.0711726	0.0960732
715	88.9712	-0.00364062	0.0460515	-0.0118556
716	88.8698	0.00660838	0.00289678	-0.153594
717	88.7318	-0.00778428	-0.0226321	-0.142186
718	88.5802	0.00503705	-0.0611623	-0.0821369
719	88.4317	-0.00248062	-0.0361124	-0.0637416
720	88.2743	-0.00207782	0.0117645	-0.0240597
721	88.1308	0.00490137	0.0222909	-0.014534
722	87.9895	-0.00555614	0.0343543	-0.0122752
723	87.8383	0.00522321	0.0171246	0.012988
724	87.6854	-0.00159222	-0.0158041	0.0414409
725	87.5466	-0.00111943	-0.0132767	0.0361802
726	87.4119	0.00397467	-0.00612131	0.020505
727	87.2748	-0.00540761	0.000950984	0.00976822
728	87.1401	0.00387588	0.0139111	-0.0073176
729	86.9973	-0.00243796	0.00112637	0.0318214
730	86.8521	-0.000934063	-0.0198624	0.0924317
731	86.7096	0.00276126	-0.0118611	0.144085
732	86.5662	-0.0027673	0.00190472	0.207942
733	86.4171	0.00188989	0.0072412	0.110538
734	86.2653	0.00234877	0.0147621	-0.0507111
735	86.113	-0.00531308	0.0307422	-0.192445
736	85.9586	0.0087536	0.0504527	-0.37287
737	85.8056	-0.00986262	-0.00753593	-0.344261
738	85.6522	0.00734123	-0.0959415	-0.242773
739	85.4966	-0.00405775	-0.0595409	-0.190194
740	85.34	-0.0032832	0.00748315	-0.10214
741	85.2719	0.00861145	0.03221	0.0133531
742	85.2409	-0.0137398	0.0665056	0.151966
743	85.2049	0.0158549	0.00545355	0.325731
744	85.1936	-0.0131008	-0.0961635	0.528193
745	85.1592	0.00941405	-0.0193463	0.427889
746	85.1261	-0.000964227	0.104289	0.215929
747	85.1193	-0.00525451	0.0740842	0.0470087
748	85.122	0.0110146	0.0192554	-0.187982
749	85.0902	-0.0136502	-0.034004	-0.206954
750	85.051	0.0108864	-0.114425	-0.160414
751	85.0231	-0.00739382	-0.0617936	-0.19124
752	84.993	-0.000684838	0.034889	-0.201411
753	84.988	0.00641552	0.039205	-0.156155
754	84.9939	-0.0109921	0.0389513	-0.0858277
755	84.9964	0.0128088	0.00277836	0.00287617
756	85.0052	-0.00930319	-0.0606002	0.117017
757	84.9149	0.0055003	-0.0147033	0.114148
758	84.7849	0.0016644	0.0611375	0.0753572
759	84.6658	-0.00682932	0.0496491	0.0680892
760	84.5222	0.0101432	0.0266055	0.0450106
761	84.4075	-0.0117431	-0.0212333	0.0732241
762	84.2949	0.00948091	-0.0942845	0.119191
763	84.1557	-0.00729977	-0.0316045	0.14683
764	84.0094	0.00409195	0.0743882	0.180422
765	83.9112	-0.00157977	0.0314721	0.0814489
766	83.8275	0.000880302	-0.0401349	-0.0730816
767	83.7339	0.000113682	-0.018943	-0.21588
768	83.6479	-0.000518793	0.0125218	-0.393759
769	83.5354	0.00159813	0.00968748	-0.361674
770	83.4142	-0.00484131	0.00689933	-0.255447
771	83.302	0.00725961	-0.0280316	-0.194494
772	83.1867	-0.0110007	-0.0802493	-0.0958268
773	83.1947	0.0124259	0.000411972	0.0236658
774	83.2546	-0.0109947	0.126109	0.164899
775	83.3061	0.00825534	0.0626193	0.343913
776	83.3914	-0.000911919	-0.0461934	0.551397
777	83.4466	-0.00486838	-0.0395298	0.456165
778	83.504	0.0114202	-0.0250032	0.249469
779	83.5976	-0.0149327	0.0169195	0.0855963
780	83.7044	0.0140339	0.0864115	-0.144343
781	83.7578	-0.0117338	0.0078198	-0.187759
782	83.7985	0.00465753	-0.117961	-0.178234
783	83.8554	0.00102898	-0.0703767	-0.244801
784	83.9077	-0.00690811	0.0131798	-0.299186
785	83.9964	0.0104884	0.0389377	-0.254068
786	84.1	-0.010344	0.075317	-0.168961
787	84.1974	0.00935966	0.0251295	-0.0761385
788	84.3029	-0.00534935	-0.0630348	0.0492434
789	84.2523	0.00221164	-0.0258096	0.0938125
790	84.1384	0.0005614	0.0378055	0.120071
791	84.0397	-0.0022981	0.0171052	0.183579
792	83.9013	0.00184592	-0.0138269	0.245798
793	83.8065	-0.0014174	-0.0107643	0.216346
794	83.7134	-0.000107226	-0.00696003	0.15123
795	83.5773	0.000794645	-0.00350323	0.0890279
796	83.4284	-0.000559108	0.00375298	0.00164609
797	83.3529	-0.000245879	0.00244634	-0.0512568
798	83.2982	0.00272851	-0.00076011	-0.10098
799	83.2266	-0.00474595	0.0213412	-0.178232
800	83.1652	0.00745855	0.0524139	-0.262057
801	83.0611	-0.0088149	-0.00205883	-0.209848
802	82.9417	0.00898683	-0.0860469	-0.105752
803	82.8347	-0.00791162	-0.0320209	-0.0145434
804	82.7213	0.00430673	0.0578401	0.109901
805	82.7202	-0.000762425	0.0263635	0.1129
806	82.7652	-0.0046627	-0.025335	0.0784336
807	82.7988	0.00844918	-0.0387229	0.0835063
808	82.8611	-0.0113577	-0.0581343	0.0749862
809	82.8939	0.012346	0.0101144	0.04572
810	82.9264	-0.00988492	0.116896	0.00544332
811	82.9897	0.00710278	0.0542676	-0.0476954
812	83.0628	-0.00146813	-0.0531054	-0.113663
813	83.0806	-0.00246637	-0.0363956	-0.0825509
814	83.0826	0.00549497	-0.00579532	-0.0175049
815	83.0975	-0.00661117	-0.00146703	0.0299727
816	83.1046	0.00377488	0.0113309	0.0961566
817	83.1437	-0.00104774	0.00325057	0.0734675
818	83.1942	-0.00434037	-0.0125263	0.0198689
819	83.2353	0.0074916	-0.0258862	-0.0106734
820	83.2812	-0.00881871	-0.0440351	-0.0553006
821	83.2305	0.00806966	0.00458974	-0.0436787
822	83.14	-0.00271394	0.0796384	-0.012282
823	83.0585	-0.00229722	0.0667746	0.00229241
824	82.9519	0.00992904	0.0359576	0.0249319
825	82.8704	-0.0149154	-0.0289991	0.0511075
826	82.7888	0.0178246	-0.126204	0.0807857
827	82.6802	-0.0180795	-0.0300047	0.118526
828	82.5627	0.0134449	0.129761	0.161714
829	82.4914	-0.00836012	0.0387792	0.0839118
830	82.4326	-0.000151662	-0.108628	-0.0419647
831	82.3625	0.00668132	-0.0793035	-0.156923
832	82.2983	-0.0124628	-0.027774	-0.302574
833	82.2064	0.0156059	0.0350741	-0.258664
834	82.1044	-0.0147128	0.131858	-0.147324
835	82.0096	0.0127109	0.0486865	-0.075843
836	81.9101	-0.00691764	-0.0939543	0.0303489
837	81.9211	0.00227403	-0.0417856	0.0722281
838	81.9776	0.00269438	0.0463503	0.0987877
839	82.0246	-0.00563031	0.0277466	0.163735
840	82.1006	0.00539862	0.00120843	0.231028
841	82.1477	-0.00443893	-0.0124158	0.177294
842	82.195	0.000235242	-0.0355659	0.0772266
843	82.2736	0.00263319	-0.0292142	-0.0148899
844	82.3625	-0.00525061	-0.0134062	-0.138151
845	82.4007	0.00604519	0.0135977	-0.123235
846	82.4256	-0.00330553	0.0529207	-0.0632782
847	82.4635	0.000504695	0.0422036	-0.0414557
848	82.4954	0.00503814	0.017153	-0.000120922
849	82.5588	-0.00855913	-0.0197846	-0.00482605
850	82.634	0.0105873	-0.0737957	-0.0240154
851	82.7017	-0.0106428	-0.0249797	-0.0213242
852	82.7752	0.00633329	0.0583294	-0.0209856
853	82.7754	-0.0023178	0.0230946	-0.00517233
854	82.7462	-0.00408939	-0.0355282	0.0184399
855	82.7261	0.00821771	-0.0372609	0.0391235
856	82.6883	-0.0100443	-0.0382996	0.0638543
857	82.6714	0.0100874	0.012057	0.0656944
858	82.6561	-0.00575135	0.0906313	0.0593812
859	82.6216	0.00195339	0.0524519	0.0582211
860	82.582	0.00347309	-0.0167405	0.053009
861	82.5809	-0.00685464	-0.0305856	0.0154173
862	82.5917	0.00766096	-0.0477766	-0.0373049
863	82.5954	-0.00723936	-0.0193318	-0.0927847
864	82.6056	0.00328815	0.0328237	-0.159957
865	82.5959	-6.49306e-05	0.0173423	-0.134864
866	82.58	-0.00379315	-0.010975	-0.0762837
867	82.5718	0.00607339	-0.0155907	-0.0338071
868	82.5618	-0.00591018	-0.0232986	0.02728
869	82.5464	0.00513439	0.00344339	0.0457291
870	82.5288	-0.00198743	0.0459045	0.0530519
871	82.5096	-0.000373345	0.0258873	0.08135
872	82.4881	0.00247027	-0.00970015	0.108844
873	82.4686	-0.00360472	-0.0160339	0.0933069
874	82.4488	0.00263427	-0.0238324	0.0613042
875	82.4264	-0.00176524	-0.0130073	0.0304913
876	82.403	-0.000183798	0.00815345	-0.0120878
877	82.3771	0.00122801	0.00904004	-0.0300321
878	82.3494	-0.000978816	0.00811547	-0.0428821
879	82.3207	0.000391784	0.0127009	-0.0689649
880	82.2905	0.00204782	0.0166353	-0.0956824
881	82.2591	-0.00358609	-0.00419418	-0.0833241
882	82.2265	0.00485945	-0.0352823	-0.0560377
883	82.1923	-0.00499407	-0.0135971	-0.0311983
884	82.1568	0.00272066	0.0231134	0.00373303
885	82.2097	-0.000576168	0.0106391	0.0229415
886	82.2993	-0.0032166	-0.0101341	0.0399301
887	82.3838	0.00555248	-0.0181623	0.0680241
888	82.4925	-0.00649515	-0.0298646	0.0981382
889	82.5781	0.00628651	0.00483751	0.0821965
890	82.6647	-0.0030129	0.0589124	0.0487807
891	82.7775	0.00032383	0.0378029	0.0195301
892	82.8994	0.00350891	-0.00130541	-0.0210136
893	82.9862	-0.0055729	-0.0193767	-0.0322541
894	83.065	0.00534862	-0.0448926	-0.0358773
895	83.155	-0.00415852	-0.0272004	-0.0524212
896	83.2424	-0.000266054	0.0076156	-0.0677902
897	83.3548	0.00369019	0.0160003	-0.0656609
898	83.4778	-0.0076656	0.0257382	-0.0569037
899	83.5971	0.00963186	-0.0067473	-0.0477875
900	83.7223	-0.00882648	-0.0593634	-0.0335597
901	83.709	0.00697914	-0.00765474	-0.00415372
902	83.6391	-0.00190623	0.0745393	0.0341439
903	83.5814	-0.00231959	0.0533067	0.0770813
904	83.4878	0.00717284	0.0133991	0.127767
905	83.4322	-0.0101552	-0.0251366	0.110703
906	83.3773	0.0108962	-0.0827917	0.068935
907	83.2836	-0.0103419	-0.0246998	0.0381453
908	83.1778	0.00685775	0.0738279	-0.00672396
909	83.1347	-0.00356435	0.0259879	-0.0262228
910	83.1085	-0.00103351	-0.0529259	-0.040362
911	83.0666	0.00428519	-0.0384639	-0.0700825
912	83.0327	-0.00645105	-0.014331	-0.101235
913	82.9605	0.00727979	0.0158631	-0.0595091
914	82.8739	-0.00567613	0.0630558	0.0109049
915	82.7971	0.00382205	0.0313696	0.0765708
916	82.7137	-0.000222696	-0.0252716	0.161377
917	82.7419	-0.00241009	-0.0205622	0.10565
918	82.8155	0.00467249	-0.00979507	-0.00140782
919	82.8775	-0.00566144	0.0044245	-0.0826302
920	82.9677	0.00464625	0.0294482	-0.191795
921	83.0276	-0.00313064	0.00463315	-0.198138
922	83.0865	-0.000143377	-0.0359596	-0.17109
923	83.1759	0.00284668	-0.0319245	-0.177195
924	83.2744	-0.00573583	-0.0215714	-0.170871
925	83.3181	0.00749807	0.0122473	-0.0586084
926	83.346	-0.00811092	0.0637367	0.101045
927	83.3861	0.0077213	0.0160458	0.268733
928	83.4182	-0.00574431	-0.0630807	0.473265
929	83.4815	0.00339326	-0.0196971	0.409741
930	83.5556	0.000390973	0.0505808	0.250277
931	83.6202	-0.00354062	0.0433613	0.140574
932	83.6891	0.00727233	0.0287424	-0.0212983
933	83.6371	-0.00941958	-0.0162106	-0.100215
934	83.5347	0.010247	-0.0857443	-0.163013
935	83.442	-0.00959043	-0.0299149	-0.282997
936	83.3169	0.0058415	0.0645253	-0.410975
937	83.2222	-0.00224514	0.0260498	-0.324182
938	83.1265	-0.00361547	-0.0376129	-0.155805
939	82.996	0.00742847	-0.0387547	-0.00541965
940	82.8534	-0.0097639	-0.0391715	0.198284
941	82.7654	0.0100681	0.0124323	0.1896
942	82.6914	-0.00596157	0.0931308	0.113625
943	82.6022	0.00212351	0.058109	0.101858
944	82.5189	0.00436182	-0.00700897	0.0633879
945	82.4005	-0.00840908	-0.031449	0.0213643
946	82.2683	0.0100732	-0.0649378	-0.0278858
947	82.1435	-0.00979712	-0.0260646	-0.104114
948	82.0118	0.00465884	0.0436653	-0.195584
949	81.9669	-0.000202032	0.0223092	-0.124522
950	81.9564	-0.00605535	-0.0156816	0.00569754
951	81.935	0.00990193	-0.0298289	0.112917
952	81.9343	-0.0107466	-0.051271	0.255283
953	81.9082	0.0100659	0.00484869	0.237726
954	81.8798	-0.00543116	0.0930771	0.166157
955	81.8739	0.00131174	0.051804	0.137682
956	81.8737	0.00360474	-0.021312	0.0852985
957	81.8279	-0.00712823	-0.0312132	0.000468227
958	81.7677	0.00874675	-0.0428515	-0.104809
959	81.7157	-0.00946578	0.00223336	-0.233094
960	81.6555	0.00866531	0.0773335	-0.384185
961	81.6187	-0.00739101	0.0150318	-0.332429
962	81.5888	0.00582482	-0.085662	-0.207486
963	81.5496	-0.00369835	-0.0383091	-0.11508
964	81.5122	0.000749471	0.0394969	0.0192567
965	81.5286	0.00226583	0.0255747	0.08626
966	81.5678	-0.00697364	0.00256973	0.140817
967	81.6065	0.0102783	-0.0345457	0.241425
968	81.6612	-0.0136188	-0.0916344	0.348665
969	81.7018	0.0146596	0.000602377	0.295401
970	81.7438	-0.0124829	0.145523	0.181828
971	81.8031	0.00920005	0.0664054	0.0824065
972	81.869	-0.00202195	-0.067539	-0.0562513
973	81.9195	-0.00386607	-0.0458542	-0.104436
974	81.9684	0.0102565	-0.00736539	-0.131012
975	82.0249	-0.0141799	0.0297444	-0.201993
976	82.0821	0.0148189	0.0906215	-0.272161
977	82.1545	-0.0139561	0.00314727	-0.232287
978	82.2345	0.0096402	-0.136458	-0.14991
979	82.3148	-0.00544617	-0.0607949	-0.0717909
980	82.4003	0.000406395	0.0663267	0.0360866
981	82.4306	0.00378028	0.0424803	0.0791391
982	82.4398	-0.00719254	0.00130619	0.108103
983	82.4569	0.00960167	-0.0301726	0.170632
984	82.4616	-0.0115054	-0.0816321	0.233978
985	82.4848	0.0119457	-0.00192604	0.219015
986	82.5109	-0.0114197	0.125254	0.174669
987	82.5235	0.00932883	0.0521462	0.13481
988	82.5336	-0.00422648	-0.0700476	0.0747994
989	82.5729	-0.000756842	-0.0365856	-0.0089634
990	82.6221	0.00894268	0.0188969	-0.111801
991	82.6674	-0.0142283	0.054643	-0.23444
992	82.7188	0.0183562	0.108793	-0.376957
993	82.7567	-0.0188137	-0.00970071	-0.324903
994	82.7913	0.0127771	-0.195119	-0.20147
995	82.8327	-0.0061544	-0.12478	-0.107163
996	82.8741	-0.00644119	0.00474066	0.0288041
997	82.8997	0.0132585	0.0687932	0.0873206
998	82.9193	-0.0271825	0.159804	0.12932
999	82.9396	0.0347211	0.0820675	0.217552
1000	82.9558	0.0126082	-0.0617703	0.309515
1001	82.9777	-0.0418856	-0.0600701	0.228298
